# Supplementary material for: Diamines as interparticle linkers for silica–titania supported PdCu bimetallic nanoparticles in Chan–Lam and Suzuki cross-coupling reactions
Source: Royal Society of Chemistry journal article supplement (doi:10.1039/c8nj05050c), 2019-01-01

## SUPPORTING INFORMATION

### **Diamines as interparticle linkers for silica-titania supported PdCu bimetallic nanoparticles in Chan-Lam and Suzuki cross-coupling reactions**

Babita Jamwal,<sup>a</sup> Manpreet Kaur,<sup>a</sup> Harsha Sharma,<sup>a</sup> Chhavi Khajuria,<sup>a</sup> Satya Paul,<sup>a,\*</sup> J. H. Clark<sup>b</sup>

<sup>a</sup>*Department of Chemistry, University of Jammu, Jammu Tawi-180006, India*

*\*Corresponding author: E-mail address: [paul7@rediffmail.com](mailto:paul7@rediffmail.com), Fax: +91-191-2431365*

<sup>b</sup>*Green Chemistry Centre of Excellence, Department of Chemistry, University of York, Heslington York YO10 5DD UK, Email: [james.clark@york.ac.uk](mailto:james.clark@york.ac.uk), Tel: + 44 (0) 1904 322559*

New Journal of Chemistry

#### **Table of contents**

**S1. FT-IR Spectra of STS and 12DA-STs**

**S2. TGA of 1,2-Diamine functionalized silica-titania support and bimetallic catalysts**

**S3. Carbon Hydrogen Nitrogen (CHN) analysis of Pd<sub>1</sub>Cu<sub>1</sub>@12DA-STs**

**S4. EDX data of Pd<sub>1</sub>Cu<sub>1</sub>@12DA-STs**

**S5. Spectral details of the compounds listed in Table 3**

**S6. Spectral details of the compounds listed in Table 4**

**S7. <sup>1</sup>H NMR and <sup>13</sup>C NMR spectra of some compounds of Table 3 and 4**

## SI. FT-IR Spectra of STS and 12DA-STS

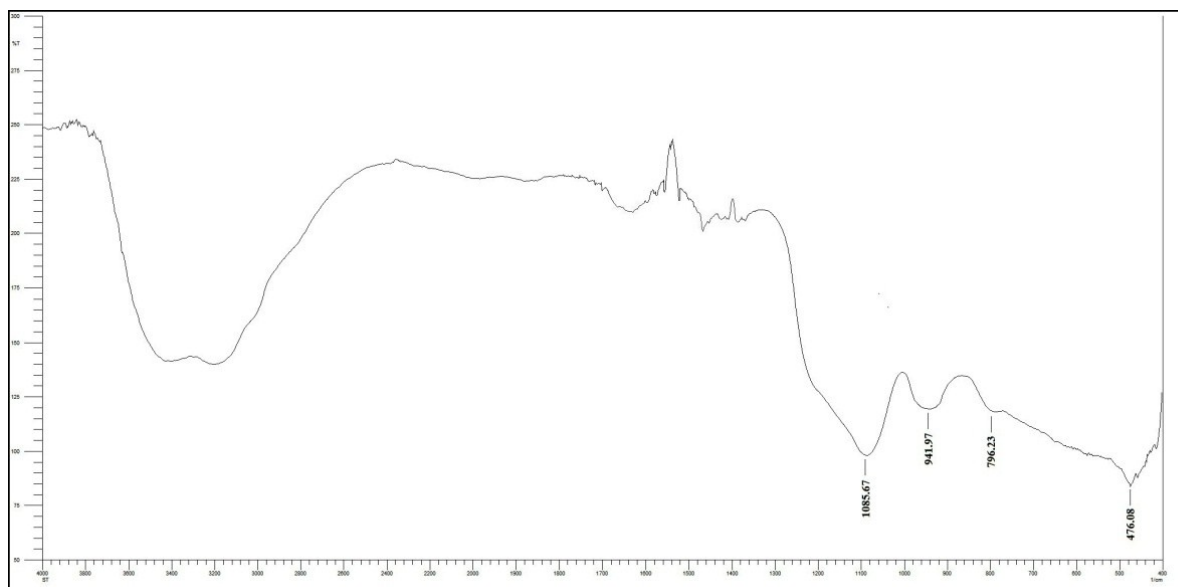

Fig. 1 FT-IR of STS

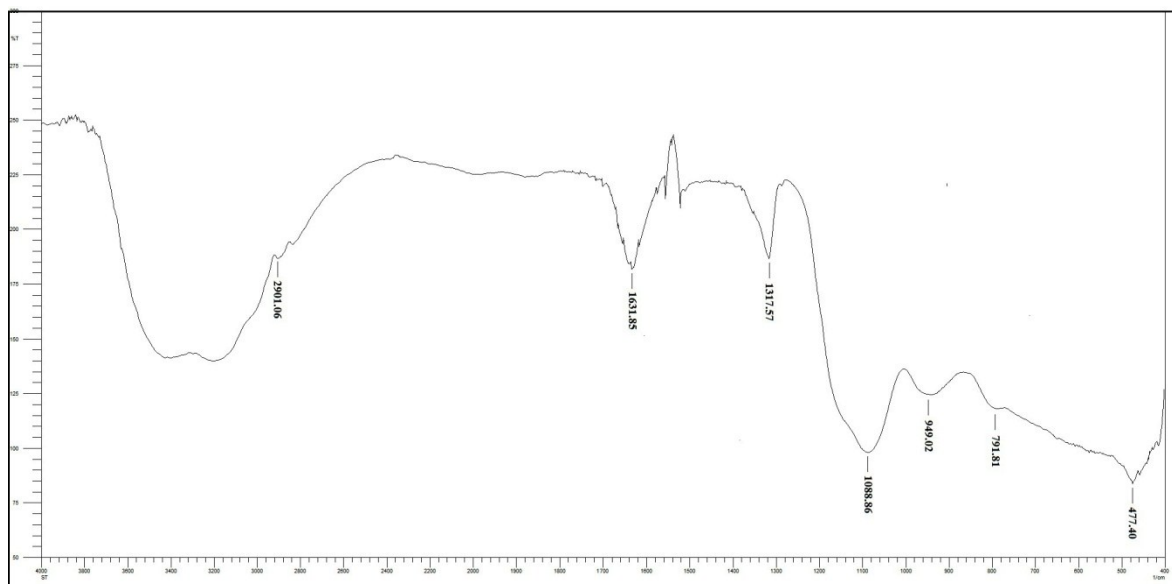

Fig. 2 FT-IR of 12DA-STS

## S2. TGA of 1,2-Diamine functionalized silica-titania support and bimetallic catalysts

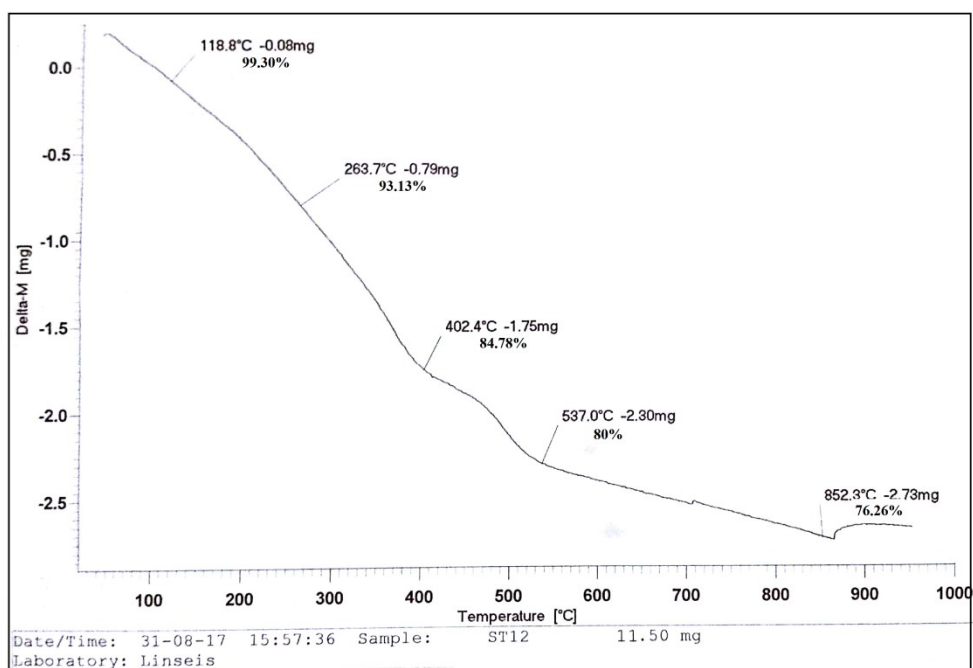

Fig. 1 TGA of 12DA-STs

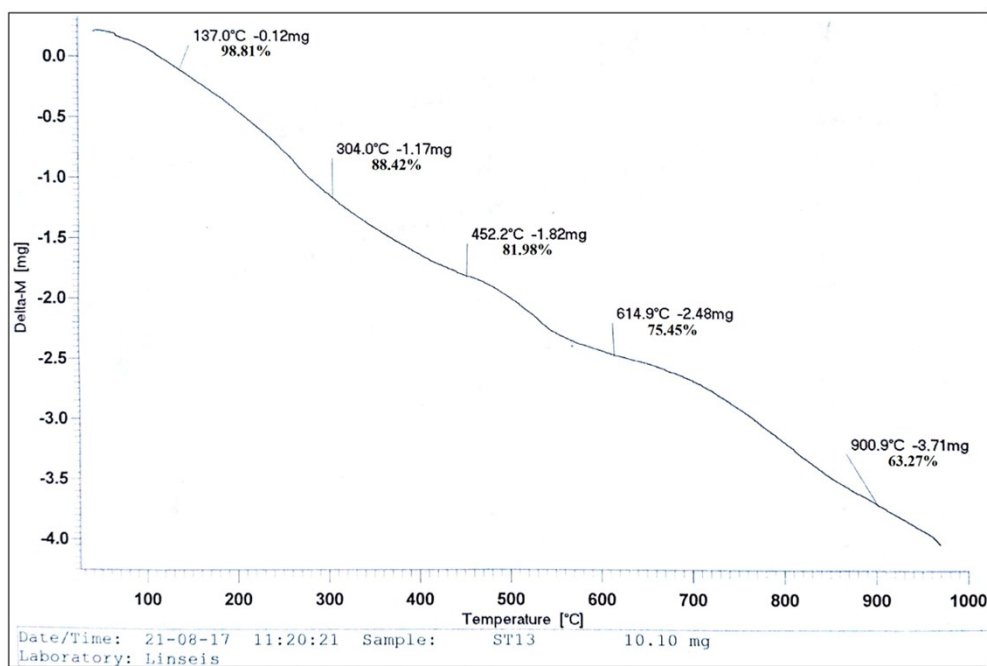

Fig. 2 TGA of Pd<sub>1</sub>Cu<sub>3</sub>@12DA-STs

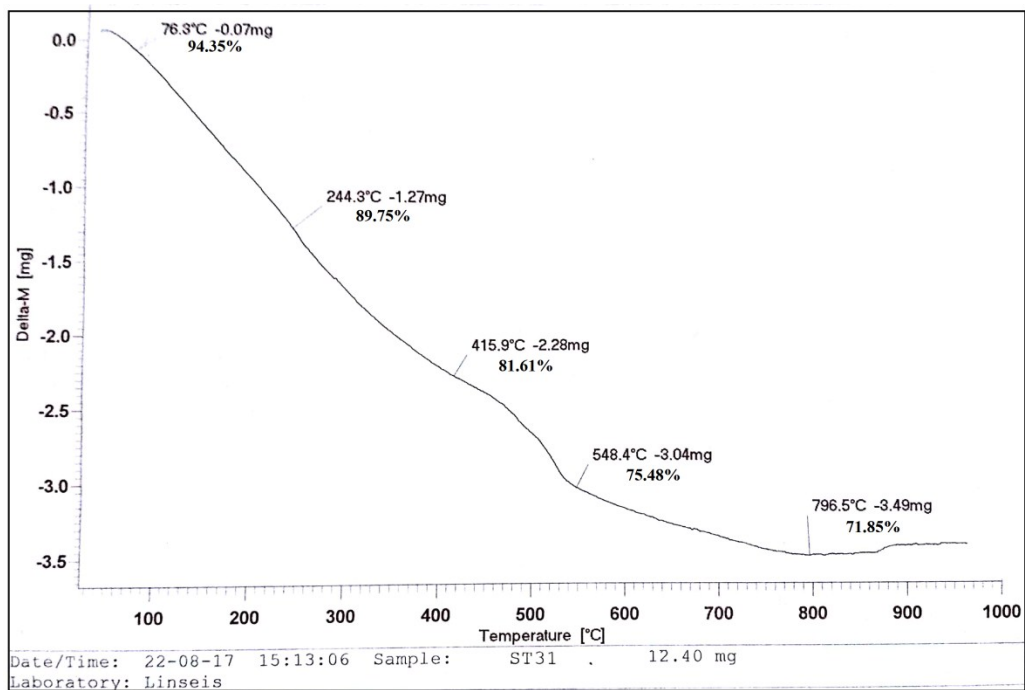

Fig. 3 TGA of Pd<sub>3</sub>Cu<sub>1</sub>@12DA-STs

S3. Carbon Hydrogen Nitrogen (CHN) analysis of Pd<sub>1</sub>Cu<sub>1</sub>@12DA-STs

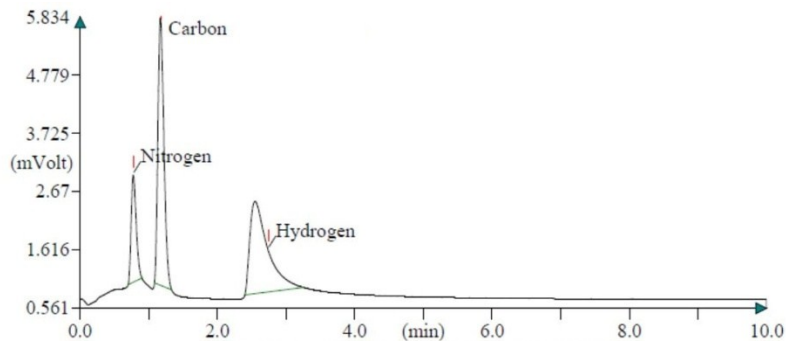

| Peak Number (#) | Retention Time (min) | Area (.1*uV*sec) | Element % | Compone |
|-----------------|----------------------|------------------|-----------|---------|
| 1               | 0.783                | 98858            | 2.344     | Nitroge |
| 2               | 1.183                | 291854           | 2.894     | Carbon  |
| 3               | 2.750                | 305092           | 1.526     | Hydroge |
|                 |                      | 695804           | 6.764     |         |

**S4. EDX data of Pd<sub>1</sub>Cu<sub>1</sub>@12DA-STs**

| <b>Element</b> | <b>Weight%</b> | <b>Atomic%</b> |
|----------------|----------------|----------------|
| <b>O K</b>     | <b>36.08</b>   | <b>56.60</b>   |
| <b>Si K</b>    | <b>18.36</b>   | <b>19.06</b>   |
| <b>C K</b>     | <b>2.35</b>    | <b>1.96</b>    |
| <b>Ti K</b>    | <b>38.42</b>   | <b>20.73</b>   |
| <b>Cu K</b>    | <b>2.94</b>    | <b>1.20</b>    |
| <b>Pd L</b>    | <b>1.85</b>    | <b>0.45</b>    |
| <b>Totals</b>  | <b>100.00</b>  |                |

## S5. Spectral details of the compounds listed in Table 3

### Diphenylamine (2a)

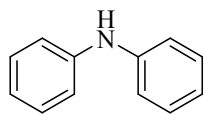

**<sup>1</sup>H NMR (400 MHz, CDCl<sub>3</sub>):** δ 5.75 (bs, 1H, NH, exchangeable with D<sub>2</sub>O), 7.37-7.41 (t, 2H, J=8 Hz, Ar-H), 7.47-7.51 (t, 4H, J=8 Hz, Ar-H), 7.63-7.65 (d, 4H, J=8 Hz, Ar-H); **<sup>13</sup>C NMR (100 MHz, CDCl<sub>3</sub>):** δ 112.8, 117.6, 129.3, 130.9, 145.2.

### *N*-(4-Methoxyphenyl)benzenamine (2b)

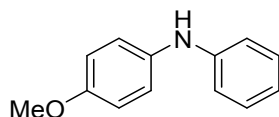

**<sup>1</sup>H NMR (400 MHz, CDCl<sub>3</sub>):** δ 3.83 (s, 3H, OCH<sub>3</sub>), 5.55 (bs, 1H, NH, exchangeable with D<sub>2</sub>O), 6.84-6.95 (m, 5H, Ar-H), 7.10-7.12 (d, 2H, J=8 Hz, Ar-H), 7.22-7.29 (m, 2H, Ar-H); **<sup>13</sup>C NMR (100 MHz, CDCl<sub>3</sub>):** δ 55.3, 109.9, 115.6, 127.1, 129.3, 132.8, 143.6.

### *N*-(2-Methoxyphenyl)benzenamine (2c)

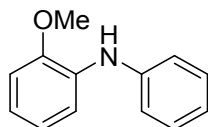

**<sup>1</sup>H NMR (400 MHz, CDCl<sub>3</sub>):** δ 3.92 (s, 3H, OCH<sub>3</sub>), 6.18 (bs, 1H, NH, exchangeable with D<sub>2</sub>O), 6.89-6.91 (d, 2H, J=8 Hz, Ar-H), 6.95-6.99 (t, 1H, J=8 Hz, Ar-H), 7.17-7.19 (d, 2H, J=8 Hz, Ar-H), 7.29-7.35 (m, 4H, Ar-H); **<sup>13</sup>C NMR (100 MHz, CDCl<sub>3</sub>):** δ 56.79, 112.83, 117.6, 122.2, 129.3, 130.9, 138.4, 143.1, 148.2.

### *N*-(3-Methoxyphenyl)benzenamine (2d)

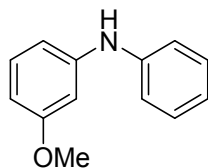

**<sup>1</sup>H NMR (400 MHz, CDCl<sub>3</sub>):** δ 3.86 (s, 3H, OCH<sub>3</sub>), 5.86 (bs, 1H, NH, exchangeable with D<sub>2</sub>O), 6.96-7.02 (m, 5H, Ar-H), 7.35-7.37 (d, 2H, J=8 Hz, Ar-H), 7.53-7.59 (m, 2H, Ar-H);

$^{13}\text{C}$  NMR (100 MHz,  $\text{CDCl}_3$ ):  $\delta$  56.7, 103.7, 112.7, 114.7, 118.1, 126.4, 129.6, 130.7, 138.2, 140.7, 161.3.

***N*-(4-Methylphenyl) benzenamine (2e)**

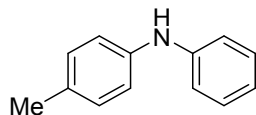

$^1\text{H}$  NMR (400 MHz,  $\text{CDCl}_3$ ):  $\delta$  2.51 (s, 3H,  $\text{CH}_3$ ), 5.84 (bs, 1H, NH, exchangeable with  $\text{D}_2\text{O}$ ), 7.36-7.39 (t, 2H,  $J=8$  Hz, Ar-H), 7.45-7.49 (t, 3H,  $J=8$  Hz, Ar-H), 7.61-7.63 (d, 4H,  $J=8$  Hz, Ar-H);  $^{13}\text{C}$  NMR (100 MHz,  $\text{CDCl}_3$ ):  $\delta$  23.0, 109.9, 115.6, 127.1, 129.3, 132.8, 143.6.

***N*-(4-Fluorophenyl)benzenamine (2f)**

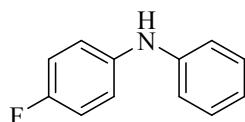

$^1\text{H}$  NMR (400 MHz,  $\text{CDCl}_3$ ):  $\delta$  5.40 (bs, 1H, NH, exchangeable with  $\text{D}_2\text{O}$ ), 7.36-7.40 (t, 2H,  $J=8$  Hz, Ar-H), 7.46-7.49 (t, 3H,  $J=8$  Hz, Ar-H), 7.62-7.64 (d, 4H,  $J=8$  Hz, Ar-H);  $^{13}\text{C}$  NMR (100 MHz,  $\text{CDCl}_3$ ):  $\delta$  116.6, 122.0, 127.1, 128.7, 130.2, 140.7.

***N*-(4-Bromophenyl)benzenamine (2g)**

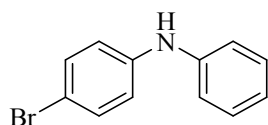

$^1\text{H}$  NMR (400 MHz,  $\text{CDCl}_3$ ):  $\delta$  5.74 (bs, 1H, NH, exchangeable with  $\text{D}_2\text{O}$ ), 6.95-7.01 (m, 2H, Ar-H), 7.07-7.09 (d, 1H,  $J=8$  Hz, Ar-H), 7.14-7.18 (t, 1H,  $J=8$  Hz, Ar-H), 7.36-7.39 (t, 1H,  $J=8$  Hz, Ar-H), 7.45-7.49 (m, 2H, Ar-H), 7.53-7.55 (d, 1H,  $J=8$  Hz, Ar-H), 7.59-7.63 (t, 1H,  $J=8$  Hz, Ar-H);  $^{13}\text{C}$  NMR (100 MHz,  $\text{CDCl}_3$ ):  $\delta$  113.1, 116.6, 122.0, 127.1, 128.7, 130.2, 138.1, 140.7.

#### 4-Aminobiphenyl (2h)

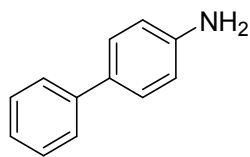

**<sup>1</sup>H NMR (400 MHz, CDCl<sub>3</sub>):**  $\delta$  4.95 (bs, 2H, NH<sub>2</sub>, exchangeable with D<sub>2</sub>O), 6.80-6.82 (d, 2H,  $J = 8$  Hz, Ar-H), 7.46-7.49 (m, 3H, Ar-H), 7.64-7.72 (m, 4H, Ar-H); **<sup>13</sup>C NMR (100 MHz, CDCl<sub>3</sub>):**  $\delta$  116.8, 126.5, 127.9, 128.5, 128.7, 136.5, 147.2.

#### *N*-(4-Nitrophenyl)benzenamine (2i)

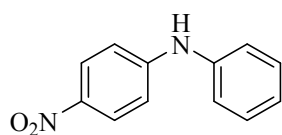

**<sup>1</sup>H NMR (400 MHz, CDCl<sub>3</sub>):**  $\delta$  5.78 (bs, 1H, NH, exchangeable with D<sub>2</sub>O), 6.52-6.54 (d, 2H,  $J=8$  Hz, Ar-H), 6.79-6.81 (d, 3H,  $J=8$  Hz, Ar-H), 7.15-7.17 (d, 2H,  $J=8$  Hz, Ar-H), 7.56-7.58 (d, 2H,  $J=8$  Hz, Ar-H); **<sup>13</sup>C NMR (100 MHz, CDCl<sub>3</sub>):**  $\delta$  112.7, 113.9, 114.8, 117.9, 128.7, 137.7, 147.8.

#### *N*-(2-Fluorophenyl)benzenamine (2j)

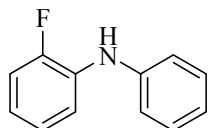

**<sup>1</sup>H NMR (400 MHz, CDCl<sub>3</sub>):**  $\delta$  5.40 (bs, 1H, NH, exchangeable with D<sub>2</sub>O), 7.14-7.16 (dd, 3H,  $J=8$  Hz, Ar-H), 7.33-7.38 (m, 3H, Ar-H), 7.55-7.57 (d, 3H,  $J=8$  Hz, Ar-H); **<sup>13</sup>C NMR (100 MHz, CDCl<sub>3</sub>):**  $\delta$  111.1, 113.9, 119.1, 124.0, 124.4, 128.7, 133.2, 147.1.

#### *N*-(2-Iodophenyl)benzenamine (2k)

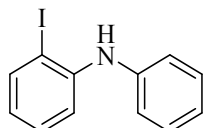

**<sup>1</sup>H NMR (400 MHz, CDCl<sub>3</sub>):**  $\delta$  4.81 (bs, 1H, NH, exchangeable with D<sub>2</sub>O), 6.79-6.81 (d, 1H,  $J=8$  Hz, Ar-H), 6.84-6.88 (t, 1H,  $J=8$  Hz, Ar-H), 7.15-7.21 (m, 2H, Ar-H), 7.28-7.38 (m, 1H, Ar-H), 7.45-7.48 (m, 4H, Ar-H); **<sup>13</sup>C NMR (100 MHz, CDCl<sub>3</sub>):**  $\delta$  115.9, 118.8, 127.1, 128.5, 128.8, 129.0, 130.4, 139.7, 143.9.



## 2-Aminobiphenyl (2l)

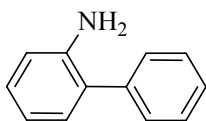

**<sup>1</sup>H NMR (400 MHz, CDCl<sub>3</sub>):**  $\delta$  3.18 (bs, 2H, NH<sub>2</sub>, exchangeable with D<sub>2</sub>O), 6.80-6.82 (d, 1H,  $J$  = 8 Hz, Ar-H), 6.85-6.89 (t, 1H,  $J$ =8 Hz, Ar-H), 7.15-7.28 (m, 1H, Ar-H), 7.37-7.39 (m, 1H, Ar-H), 7.44-7.48 (m, 3H, Ar-H), 7.62-7.64 (d, 2H,  $J$ =8 Hz, Ar-H); **<sup>13</sup>C NMR (100 MHz, CDCl<sub>3</sub>):**  $\delta$  115.4, 119.1, 127.1, 128.0, 128.5, 129.3, 130.6, 139.4, 143.2.

## N-Butylbenzenamine (2m)

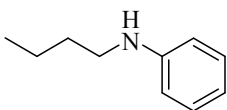

**<sup>1</sup>H NMR (400 MHz, CDCl<sub>3</sub>):**  $\delta$  0.98-1.0 (t, 3H,  $J$ =4 Hz, CH<sub>3</sub>), 1.36-1.43 (m, 2H, CH<sub>2</sub>), 1.50-1.57 (m, 2H, CH<sub>2</sub>), 3.09-3.14 (m, 2H, CH<sub>2</sub>), 4.33 (bs, 1H, NH, exchangeable with D<sub>2</sub>O), 7.38-7.40 (d, 2H,  $J$ =8 Hz, Ar-H), 7.45-7.49 (t, 1H,  $J$ =8 Hz, Ar-H), 7.62-7.64 (d, 2H,  $J$ =8 Hz, Ar-H); **<sup>13</sup>C NMR (100 MHz, CDCl<sub>3</sub>):**  $\delta$  13.8, 20.2, 32.4, 44.8, 113.5, 117.2, 129.6, 147.6.

## N-Benylbenzenamine (2n)

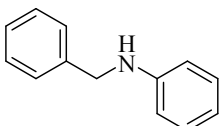

**<sup>1</sup>H NMR (400 MHz, CDCl<sub>3</sub>):**  $\delta$  4.01(s, 2H, CH<sub>2</sub>), 4.48(bs, 1H, NH, exchangeable with D<sub>2</sub>O), 6.55-6.57 (d, 2H,  $J$ =8 Hz, Ar-H), 6.66-6.69 (t, 1H,  $J$ =6 Hz, Ar-H), 7.13-7.16 (t, 2H,  $J$ =6 Hz, Ar-H), 7.20-7.23 (m, 1H, Ar-H), 7.26-7.31 (m, 4H, Ar-H); **<sup>13</sup>C NMR (100 MHz, CDCl<sub>3</sub>):**  $\delta$  68.27, 112.9, 117.4, 127.9, 128.6, 130.8, 132.6, 134.3, 167.8.

## N, N-Diphenylbenzenamine (2o)

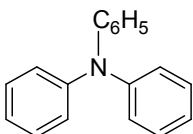

**<sup>1</sup>H NMR (400 MHz, CDCl<sub>3</sub>):**  $\delta$  6.93-6.96 (m, 3H, Ar-H), 7.07-7.09 (m, 6H, Ar-H), 7.22-7.23 (m, 6H, Ar-H); **<sup>13</sup>C NMR (100 MHz, CDCl<sub>3</sub>):**  $\delta$  120.7, 130.5, 142.2.

***N*-(4-Methoxyphenyl)-4-fluorobenzenamine(2p)**

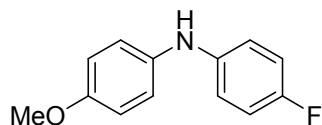

**<sup>1</sup>H NMR (400 MHz, CDCl<sub>3</sub>):** δ 3.82 (s, 3H, OCH<sub>3</sub>), 5.39 (bs, 1H, NH, exchangeable with D<sub>2</sub>O), 6.87-6.89 (d, 2H, J=8 Hz, Ar-H), 6.93-6.98 (m, 2H, Ar-H), 7.35-7.37(d, 2H, J=8 Hz, Ar-H), 7.52-7.54 (d, 2H, J=8 Hz, Ar-H). **<sup>13</sup>C NMR (100 MHz, CDCl<sub>3</sub>):** δ 55.6, 114.7, 116.6, 122.5, 123.9, 129, 135.1, 138.3, 149.8, 155.5.

***N*-(4-Methoxyphenyl)-3-fluorobenzenamine (2q)**

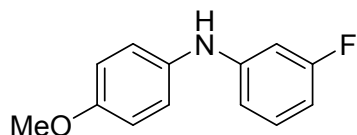

**<sup>1</sup>H NMR (400 MHz, CDCl<sub>3</sub>):** δ 3.82 (s, 3H, OCH<sub>3</sub>), 5.57 (bs, 1H, NH, exchangeable with D<sub>2</sub>O), 6.48-6.52 (m, 1H, Ar-H), 6.57-6.62 (m, 2H, Ar-H), 6.88-6.90 (d, 2H, J=8 Hz, Ar-H), 7.09-7.16 (m, 3H, Ar-H). **<sup>13</sup>C NMR (100 MHz, CDCl<sub>3</sub>):** 55.2, 108.1, 110.2, 115.1, 116.6, 124.7, 132.2, 134.9, 139.9, 151.2, 158.3.

***N*-(4-bromophenyl) 4-chlorobenzenamine (2r)**

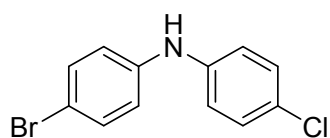

**<sup>1</sup>H NMR (400 MHz, CDCl<sub>3</sub>):** δ 5.46 (bs, 1H, NH, exchangeable with D<sub>2</sub>O), 6.95-6.97 (d, J = 8.0 Hz, 2H), 7.03-7.05 (d, J = 8.0 Hz, 2H), 7.19-7.21 (d, J = 8.0 Hz, 2H), 7.33-7.35 (d, J = 8 Hz, 2H). **<sup>13</sup>C NMR (100 MHz, CDCl<sub>3</sub>):** 116.7, 121.4, 125.3, 127.5, 129.3, 132.2, 140.7, 142.1.

### 4'-Chloro-4-aminobiphenyl

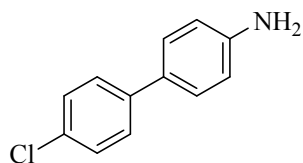

**<sup>1</sup>H NMR (400 MHz, CDCl<sub>3</sub>):**  $\delta$  4.65 (bs, 2H, NH<sub>2</sub>, exchangeable with D<sub>2</sub>O), 6.75-6.77 (d, 2H,  $J = 8$  Hz, Ar-H), 7.43-7.45 (d, 2H,  $J = 8$  Hz, Ar-H), 7.55-7.57 (d, 2H,  $J = 8$  Hz, Ar-H), 7.61-7.63 (d, 2H,  $J = 8$  Hz, Ar-H), **<sup>13</sup>C NMR (100 MHz, CDCl<sub>3</sub>):**  $\delta$  116.7, 126.5, 127.9, 128.5, 129.2, 133.1, 134.5, 147.5.

### *N,N*-Diethylbenzenamine(2t)

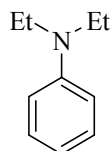

**<sup>1</sup>H NMR (400 MHz, CDCl<sub>3</sub>):**  $\delta$  1.90 (s, 6H, 2 $\times$ CH<sub>3</sub>), 2.32 (s, 4H, 2 $\times$ CH<sub>2</sub>), 6.78-6.63 (m, 2H, Ar-H), 7.04-7.09 (m, 3H, Ar-H); **<sup>13</sup>C NMR (100 MHz, CDCl<sub>3</sub>):**  $\delta$  12.5, 27.8, 112.6, 113.7, 114.8, 127.8, 129.6, 139.4, 143.8.

## S6. Spectral details of the compounds listed in Table 4

### 4-Acetylbiphenyl (3a)

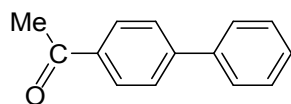

**<sup>1</sup>H NMR (400 MHz, CDCl<sub>3</sub>):**  $\delta$  2.62 (s, 3H, CH<sub>3</sub>), 7.41-7.44 (m, 1H, Ar-H), 7.48-7.52 (t, 2H,  $J = 8.0$  Hz, Ar-H), 7.65-7.66 (d, 2H,  $J = 4.0$  Hz, Ar-H), 7.70-7.72 (d, 2H,  $J = 8.0$  Hz, Ar-H), 8.05-8.07 (d, 2H,  $J = 8.0$  Hz, Ar-H); **<sup>13</sup>C NMR (100 MHz, CDCl<sub>3</sub>):**  $\delta$  26.6, 127.2, 128.2, 128.3, 128.9, 135.8, 139.8, 145.8, 197.7.

### Phenyl-4-biphenyl ketone (3b)

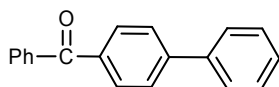

**<sup>1</sup>H NMR (400 MHz, CDCl<sub>3</sub>):**  $\delta$  7.42-7.46 (m, 1H, Ar-H), 7.50-7.55 (m, 4H, Ar-H), 7.62-7.64 (m, 2H Ar-H) 7.68-7.70 (d, 1H,  $J = 8.0$  Hz, Ar-H), 7.73-7.75 (d, 2H,  $J = 8.0$  Hz, Ar-H),

7.86-7.88 (d, 2H, J = 8.0 Hz, Ar-H), 7.92-7.94 (d, 2H, J = 8.0 Hz, Ar-H);  $^{13}\text{C}$  NMR (100 MHz,  $\text{CDCl}_3$ ):  $\delta$  126.4, 127.2, 128.3, 129.0, 130.1, 130.9, 132.8, 136.5, 137.4, 140.0, 145.3, 157.3, 196.8.

### 3-Chlorobiphenyl (3c)

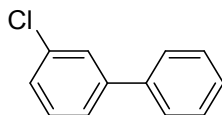

$^1\text{H}$  NMR (400 MHz,  $\text{CDCl}_3$ ):  $\delta$  7.29-7.35 (m, 3H, Ar-H), 7.42-7.47 (m, 3H, Ar-H), 7.54-7.58 (m, 3H, Ar-H);  $^{13}\text{C}$  NMR (100 MHz,  $\text{CDCl}_3$ ):  $\delta$  126.0, 127.7, 127.8, 127.9, 129.3, 130.7, 136.5, 137.9.

### 1-Phenylnaphthalene (3d)

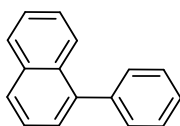

$^1\text{H}$  NMR (400 MHz,  $\text{CDCl}_3$ ):  $\delta$  7.58-7.66 (m, 4H, Ar-H), 7.65-7.72 (m, 5H, Ar-H), 8.04-8.06 (d, 1H, J = 8.0 Hz, Ar-H), 8.09-8.11 (d, 1H, J = 8.0 Hz, Ar-H),  $\delta$  8.14-8.16 (d, 1H, J = 8.0 Hz, Ar-H);  $^{13}\text{C}$  NMR (100 MHz,  $\text{CDCl}_3$ ):  $\delta$  125.7, 125.9, 126.2, 127.3, 127.4, 127.8, 128.3, 128.5, 129.2, 130.3, 131.8, 134.0, 140.7, 141.0.

### 4-(Phenyl) biphenyl (3e)

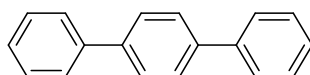

$^1\text{H}$  NMR (400 MHz,  $\text{CDCl}_3$ ):  $\delta$  7.35-7.38 (m, 2H, Ar-H), 7.46-7.50 (m, 4H, Ar-H), 7.60-7.62 (d, 4H, J = 8.0 Hz, Ar-H), 7.64-7.67 (m, 4H, Ar-H);  $^{13}\text{C}$  NMR (100 MHz,  $\text{CDCl}_3$ ):  $\delta$  122.3, 126.1, 126.3, 126.9, 129.0, 135.6, 140.2, 141.3.

### 4-Phenylphenol (3f)

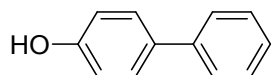

**$^1\text{H}$  NMR (400 MHz,  $\text{CDCl}_3$ ):**  $\delta$  4.93 (s, 1H, OH), 6.93-6.95 (d, 2H,  $J = 8.0$  Hz, Ar-H), 7.31-7.35 (t, 1H,  $J = 8.0$  Hz, Ar-H), 7.42-7.46 (t, 2H,  $J = 8.0$  Hz, Ar-H), 7.50-7.52 (d, 2H,  $J = 8.0$  Hz, Ar-H), 7.56-7.58 (d, 2H,  $J = 8.0$  Hz, Ar-H);  **$^{13}\text{C}$  NMR (100 MHz,  $\text{CDCl}_3$ ):**  $\delta$  119.1, 127.2, 127.7, 128.6, 128.7, 129.1, 136.1, 154.9.

### Biphenyl (3g)

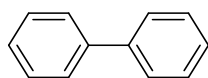

**$^1\text{H}$  NMR (400 MHz,  $\text{CDCl}_3$ ):**  $\delta$  7.38-7.42 (m, 2H, Ar-H), 7.50-7.53 (m, 4H Ar-H), 7.65-7.67 (d, 4H,  $J = 8.0$  Hz, Ar-H);  **$^{13}\text{C}$  NMR (100 MHz,  $\text{CDCl}_3$ ):**  $\delta$  141.0, 127.3, 127.4, 128.9, 141.0.

### 2-Phenylpyridine (3h)

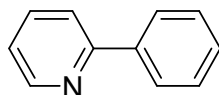

**$^1\text{H}$  NMR (400 MHz,  $\text{CDCl}_3$ ):**  $\delta = 7.25$ – $7.29$  (m, 1H, Ar-H),  $7.45$ – $7.52$  (m, 3H, Ar-H),  $7.74$ – $7.81$  (m, 2H, Ar-H),  $8.00$ – $8.02$  (d, 2H,  $J = 8$  Hz, Ar-H),  $8.72$ – $8.74$  (d, 1H,  $J = 8.0$  Hz, Ar-H);  **$^{13}\text{C}$  NMR (100 MHz,  $\text{CDCl}_3$ ):**  $\delta$  119.1, 121.4, 126.4, 128.0, 128.9, 136.9, 139.8, 146.4, 157.8.

### 3-Phenylpyridine (3i)

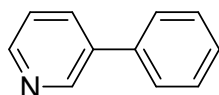

**$^1\text{H}$  NMR (400 MHz,  $\text{CDCl}_3$ ):**  $\delta = 7.27$ – $7.32$  (m, 2H, Ar-H),  $7.36$ – $7.40$  (t, 2H,  $J = 7.2$  Hz, Ar-H),  $7.48$  (d, 2H,  $J = 7.2$  Hz, Ar-H),  $7.76$ – $7.78$  (m, 1H, Ar-H),  $8.49$ – $8.50$  (m, 1H, Ar-H),  $8.75$  (s, 1H, Ar-H);  **$^{13}\text{C}$  NMR (100 MHz,  $\text{CDCl}_3$ ):**  $\delta$  123.5, 127.1, 128.1, 129.5, 134.3, 136.6, 137.6, 148.3, 148.6.

### 3-Phenyl-1H-indole (3j)

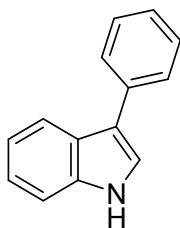

**<sup>1</sup>H NMR (400 MHz, CDCl<sub>3</sub>):** δ 6.96-6.97 (d, 2H, J = 4.0 Hz, Ar-H), 7.05-7.08 (t, 2H, J = 8.0 Hz, Ar-H), 7.18-7.20 (t, 2H, J = 8.0 Hz, Ar-H), 7.37-7.39 (d, 2H, J = 8.0 Hz, Ar-H), 7.59-7.61 (d, 2H, J = 8.0 Hz, Ar-H), 7.95 (bs, 1H, NH); **<sup>13</sup>C NMR (100 MHz, CDCl<sub>3</sub>):** δ 110.0, 111.3, 118.0, 119.0, 122.1, 124.7, 127.0, 128.7, 128.8, 129.4, 129.9, 136.5, 138.2.

### 5-Methoxy-3-phenyl-1H-indole (3k)

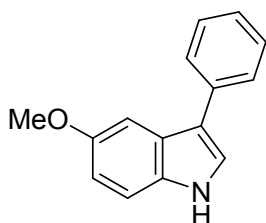

**<sup>1</sup>H NMR (400 MHz, CDCl<sub>3</sub>):** δ 3.80 (s, 3H, OCH<sub>3</sub>), 6.75-6.79 (t, 2H, J = 8.0 Hz, Ar-H), 6.82-6.86 (t, 2H, J = 8.0 Hz, Ar-H), 6.95 (s, 1H, Ar-H), 7.01-7.04 (d, 2H, J = 12.0 Hz, Ar-H), 7.17-7.19 (d, 2H, J = 8.0 Hz, Ar-H), 7.84 (bs, 1H, NH); **<sup>13</sup>C NMR (100 MHz, CDCl<sub>3</sub>):** δ 55.2, 102.3, 109.6, 110.7, 112.6, 124.9, 127.4, 128.6, 128.9, 129.7, 130.7, 136.6, 156.2.

### 5-Phenyl-1H-indole (3l)

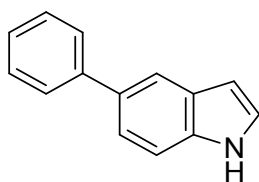

**<sup>1</sup>H NMR (400 MHz, CDCl<sub>3</sub>):** δ 6.64-6.65 (d, 1H, J = 4.0 Hz, Ar-H), 7.23-7.25 (t, 2H, J = 8.0 Hz, Ar-H), 7.34-7.36 (d, 2H, J = 8.0 Hz, Ar-H), 7.45-7.49 (m, 2H, Ar-H), 7.67-7.69 (d, 2H, J = 8.0 Hz, Ar-H), 7.89 (s, 1H, Ar-H), 8.23 (bs, 1H, NH); **<sup>13</sup>C NMR (100 MHz, CDCl<sub>3</sub>):** δ 102.3, 111.2, 117.1, 124.1, 128.9, 129.3, 129.4, 133.0, 135.2, 144.8.

### 2-(4-Acetylphenyl)thiophene (3m)

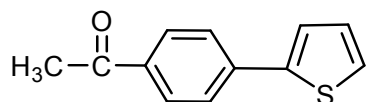

**<sup>1</sup>H NMR (400 MHz, CDCl<sub>3</sub>):**  $\delta$  2.65 (s, 3H, CH<sub>3</sub>), 7.30-7.32 (d, 2H, J = 8.0 Hz, Ar-H), 7.44-7.47 (m, 2H, Ar-H), 7.60-7.61 (m, 1H, Ar-H), 8.01-8.03 (d, 2H, J = 8.0 Hz, Ar-H); **<sup>13</sup>C NMR (100 MHz, CDCl<sub>3</sub>):**  $\delta$  26.8, 122.2, 126.6, 126.9, 129.0, 129.3, 135.3, 140.4, 140.9, 197.7.

### 4'-Methoxy-4-acetylbiphenyl(3n)

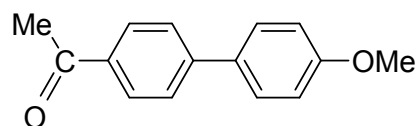

**<sup>1</sup>H NMR (400 MHz, CDCl<sub>3</sub>):**  $\delta$  2.64 (s, 3H, CH<sub>3</sub>), 3.87 (s, 3H, OMe), 7.00-7.02 (d, 2H, J = 8.0Hz, Ar-H), 7.58-7.60 (d, 2H, J= 8.0Hz, Ar-H), 7.64-7.66 (d, 2H, J= 8.0Hz, Ar-H), 8.00-8.03(d, 2H, J= 8 Hz, Ar-H); **<sup>13</sup>C NMR (100 MHz, CDCl<sub>3</sub>):**  $\delta$  21.6, 55.3, 114.2, 126.5, 127.2, 128.8, 129.9, 133.2, 141.1, 158.8, 196.7.

### 3'-Trifluoromethyl-4-acetylbiphenyl(3o)

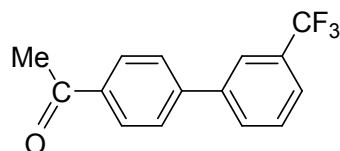

**<sup>1</sup>H NMR (400 MHz, CDCl<sub>3</sub>):**  $\delta$  2.65 (s, 3H, CH<sub>3</sub>), 7.57-7.61 (t, 1H, J=8.0 Hz, Ar-H), 7.65-7.70(m, 3H, Ar-H), 7.78-7.80 (d, 1H, J=8.0Hz, Ar-H), 7.86 (s, 1H, Ar-H), 8.05-8.07 (d, 2H, J= 8.0 Hz, Ar-H); **<sup>13</sup>C NMR (100 MHz, CDCl<sub>3</sub>):**  $\delta$  21.3, 124.2, 126.7, 127.9, 129.3, 131.3, 135.6, 136.8, 140.6, 142.3, 197.1.

### 2'-Thiomethyl-4-acetylbiphenyl(3p)

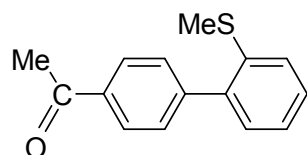

**<sup>1</sup>H NMR (400 MHz, CDCl<sub>3</sub>):** δ 2.47 (s, 3H, SCH<sub>3</sub>), 2.65 (s, 3H, CH<sub>3</sub>), 7.06-7.10 (m, 1H, Ar-H), 7.12-7.16 (m, 1H, Ar-H), 7.23-7.25 (d, 1H, J=8.0Hz, Ar-H), 7.37-7.39 (d, 1H, J=8.0Hz, Ar-H), 7.58-7.60 (d, 2H, J=8.0Hz, Ar-H), 7.91-7.93 (d, 2H, J=8.0Hz, Ar-H), **<sup>13</sup>C NMR (100 MHz, CDCl<sub>3</sub>):** δ 15.6, 21.8, 125.3, 126.8, 127.4, 128.1, 128.9, 131.6, 135.1, 137.5, 140.2, 196.7.

### 2-Ethylbiphenyl(3q)

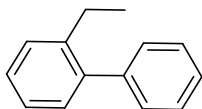

**<sup>1</sup>H NMR (400 MHz, CDCl<sub>3</sub>):** δ 1.38-1.42 (t, J = 8.0 Hz, 3H), 2.77-2.86(q, J = 12.0 Hz, 2H) 7.19-7.25 (m, 4H, Ar-H), 7.27-7.32 (m, 3H, Ar-H), 7.38-7.42 (m, 2H, Ar-H); **<sup>13</sup>C NMR (100 MHz, CDCl<sub>3</sub>):** δ 15.6, 28.5, 125.6, 126.3, 127.6, 127.9, 128.2 129.2, 132.4, 138.7.



## S7. <sup>1</sup>H NMR and <sup>13</sup>C NMR spectra of some compounds of Table 3 and 4

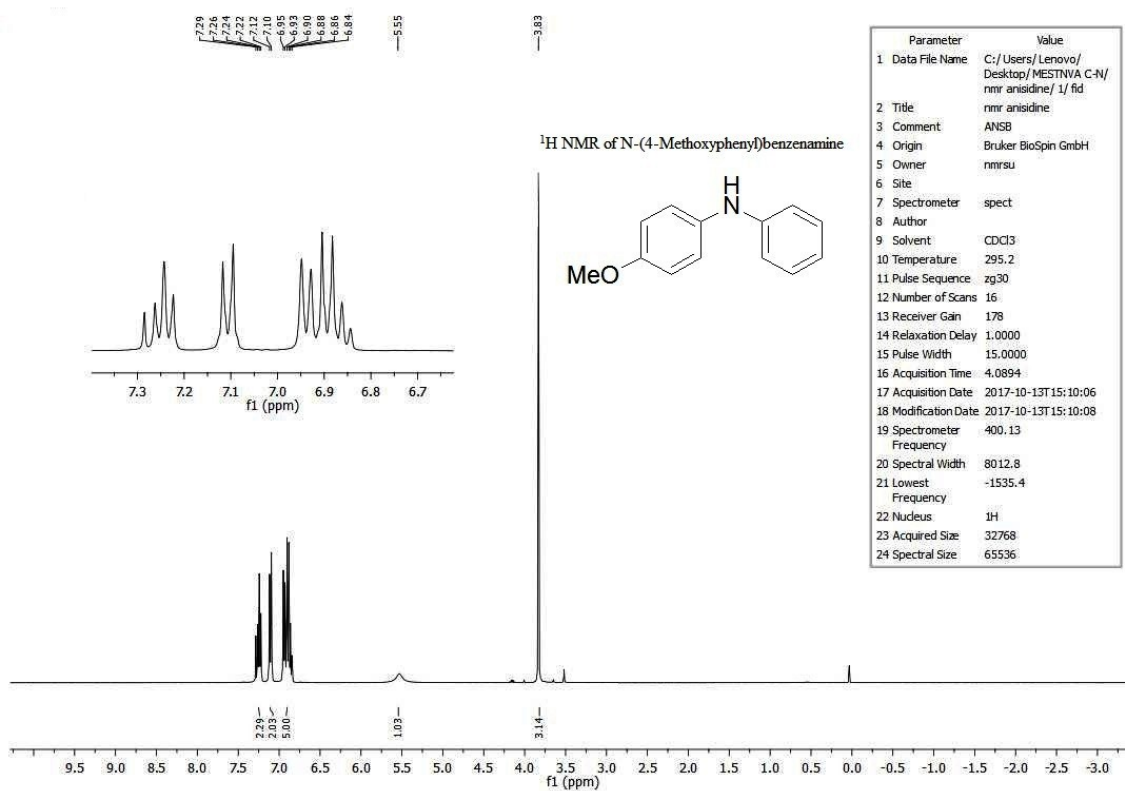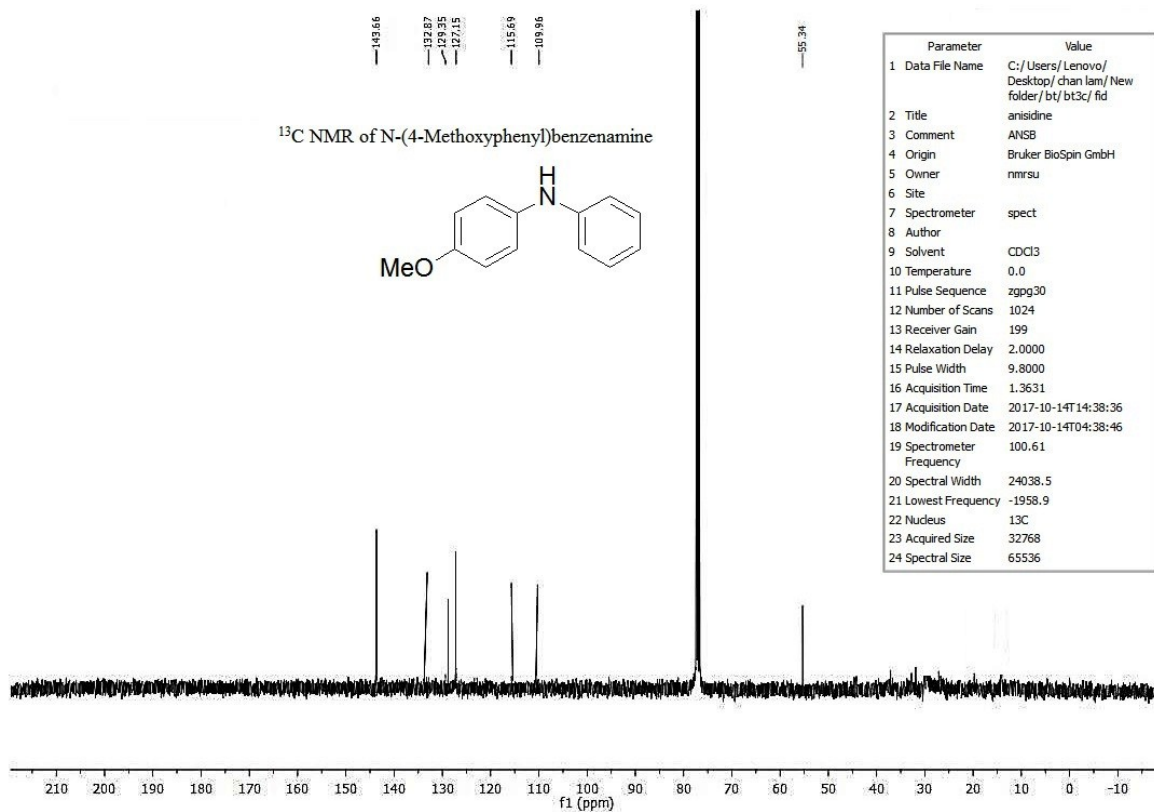

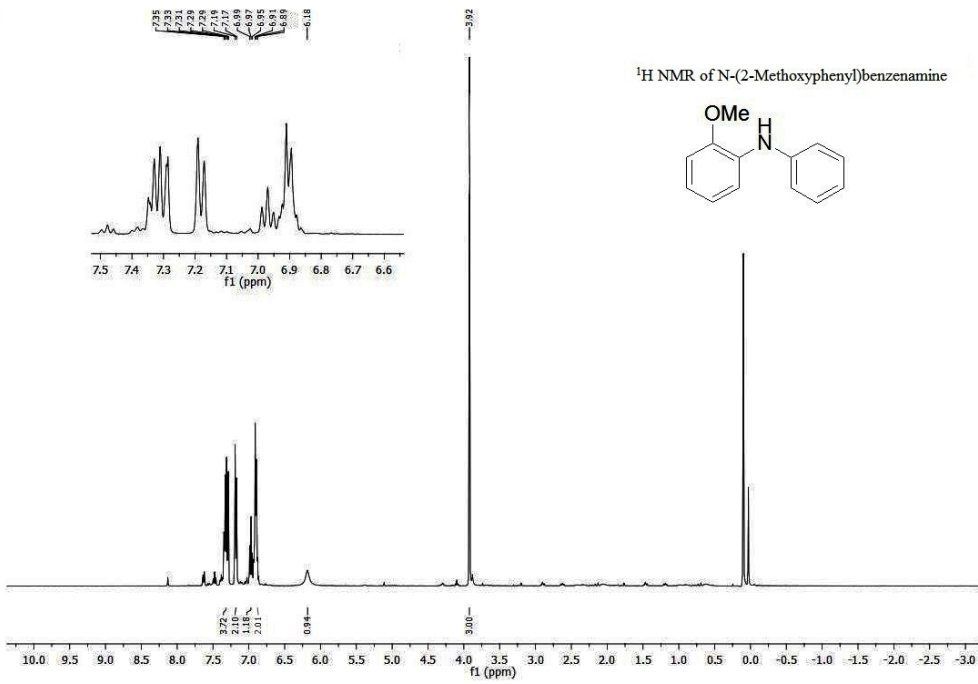

| Parameter                 | Value                                            |
|---------------------------|--------------------------------------------------|
| 1 Data File Name          | C:/Users/Lenovo/Desktop/shally/OMeAnisidine/ fid |
| 2 Title                   | shally                                           |
| 3 Comment                 | CHOMA                                            |
| 4 Origin                  | Bruker BioSpin GmbH                              |
| 5 Owner                   | nmrsu                                            |
| 6 Site                    |                                                  |
| 7 Spectrometer            | spect                                            |
| 8 Author                  |                                                  |
| 9 Solvent                 | CDCl3                                            |
| 10 Temperature            | 0.0                                              |
| 11 Pulse Sequence         | zg30                                             |
| 12 Number of Scans        | 16                                               |
| 13 Receiver Gain          | 159                                              |
| 14 Relaxation Delay       | 1.0000                                           |
| 15 Pulse Width            | 15.0000                                          |
| 16 Acquisition Time       | 4.0894                                           |
| 17 Acquisition Date       | 2018-02-08T13:27:26                              |
| 18 Modification Date      | 2018-02-08T13:27:28                              |
| 19 Spectrometer Frequency | 400.13                                           |
| 20 Spectral Width         | 8012.8                                           |
| 21 Lowest Frequency       | -1535.4                                          |
| 22 Nucleus                | 1H                                               |
| 23 Acquired Size          | 32768                                            |
| 24 Spectral Size          | 65536                                            |

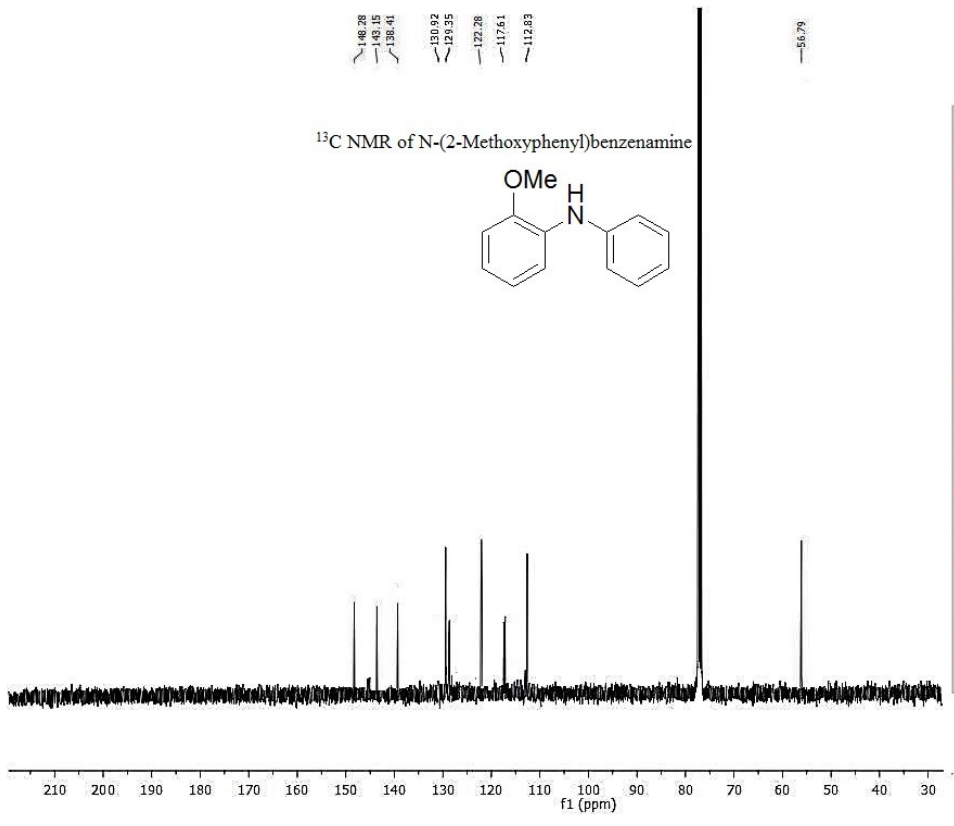

| Parameter                 | Value                                            |
|---------------------------|--------------------------------------------------|
| 1 Data File Name          | C:/Users/Lenovo/Desktop/shally/OMeAnisidine/ fid |
| 2 Title                   | shally                                           |
| 3 Comment                 | CHOMA                                            |
| 4 Origin                  | Bruker BioSpin GmbH                              |
| 5 Owner                   | nmrsu                                            |
| 6 Site                    |                                                  |
| 7 Spectrometer            | spect                                            |
| 8 Author                  |                                                  |
| 9 Solvent                 | CDCl3                                            |
| 10 Temperature            | 0.0                                              |
| 11 Pulse Sequence         | zgpg30                                           |
| 12 Number of Scans        | 815                                              |
| 13 Receiver Gain          | 199                                              |
| 14 Relaxation Delay       | 2.0000                                           |
| 15 Pulse Width            | 9.8000                                           |
| 16 Acquisition Time       | 1.3631                                           |
| 17 Acquisition Date       | 2018-02-09T11:26:27                              |
| 18 Modification Date      | 2018-02-09T11:26:34                              |
| 19 Spectrometer Frequency | 100.61                                           |
| 20 Spectral Width         | 24038.5                                          |
| 21 Lowest Frequency       | -1958.9                                          |
| 22 Nucleus                | 13C                                              |
| 23 Acquired Size          | 32768                                            |
| 24 Spectral Size          | 65536                                            |

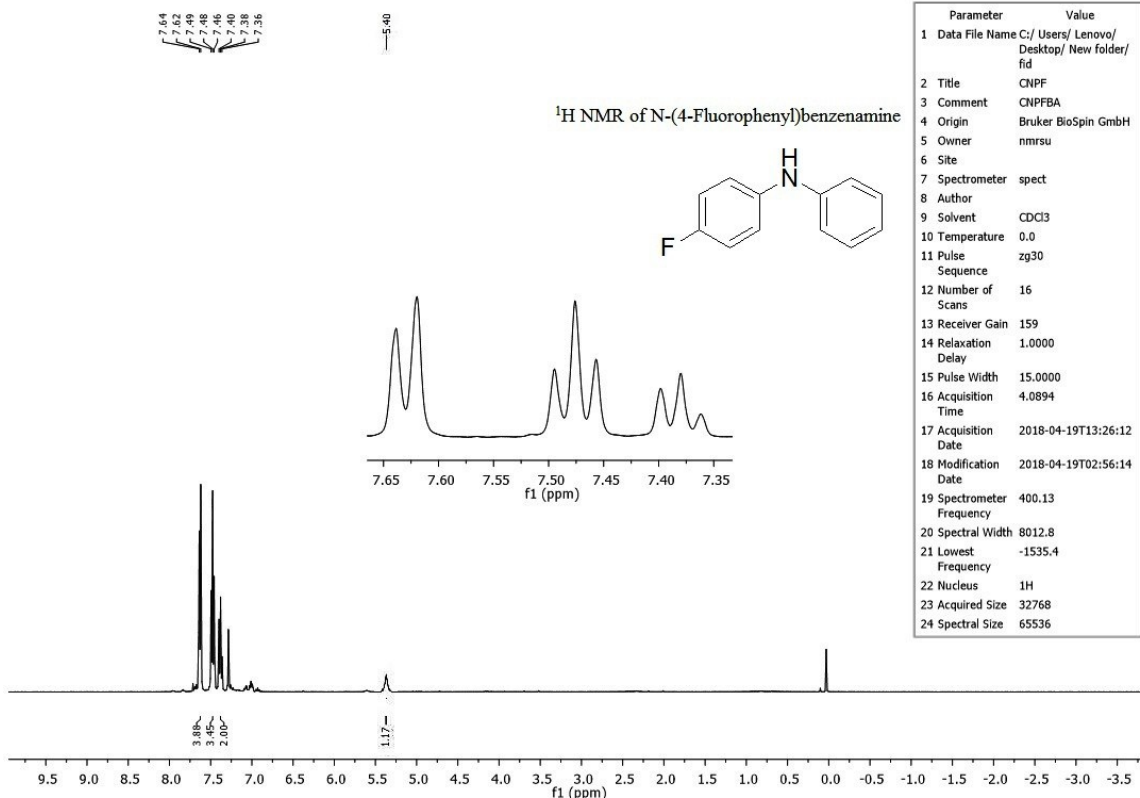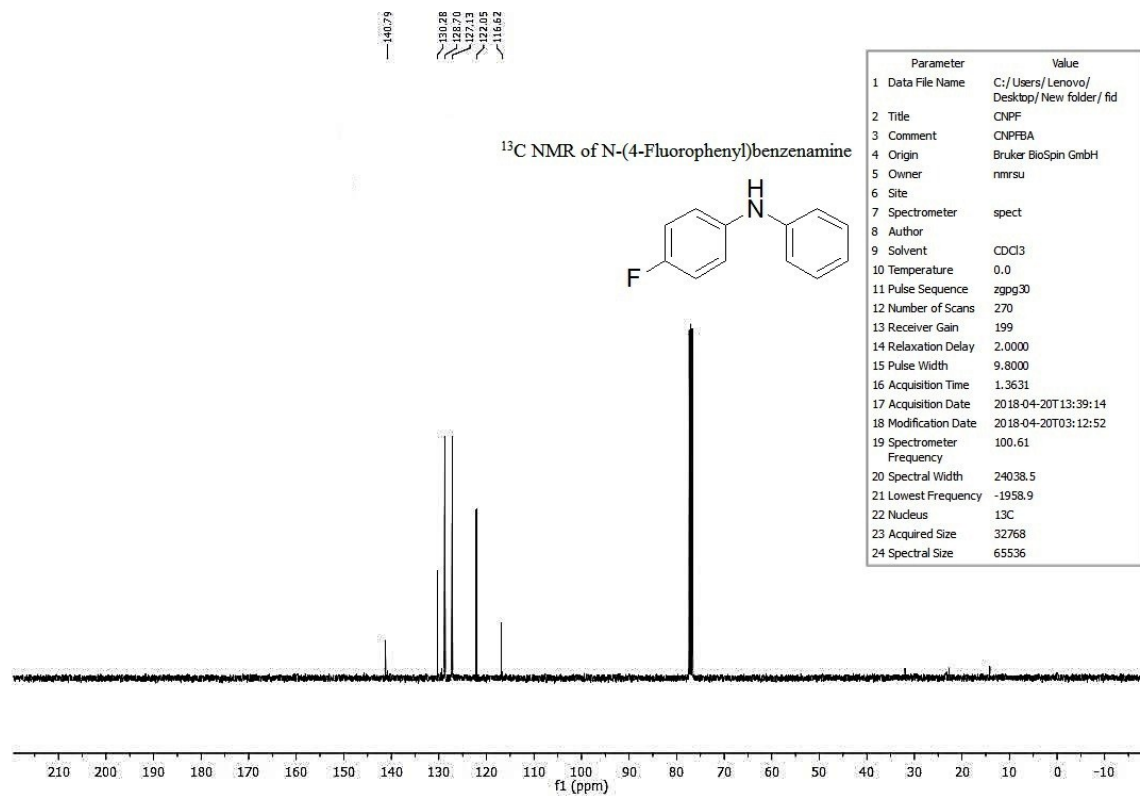

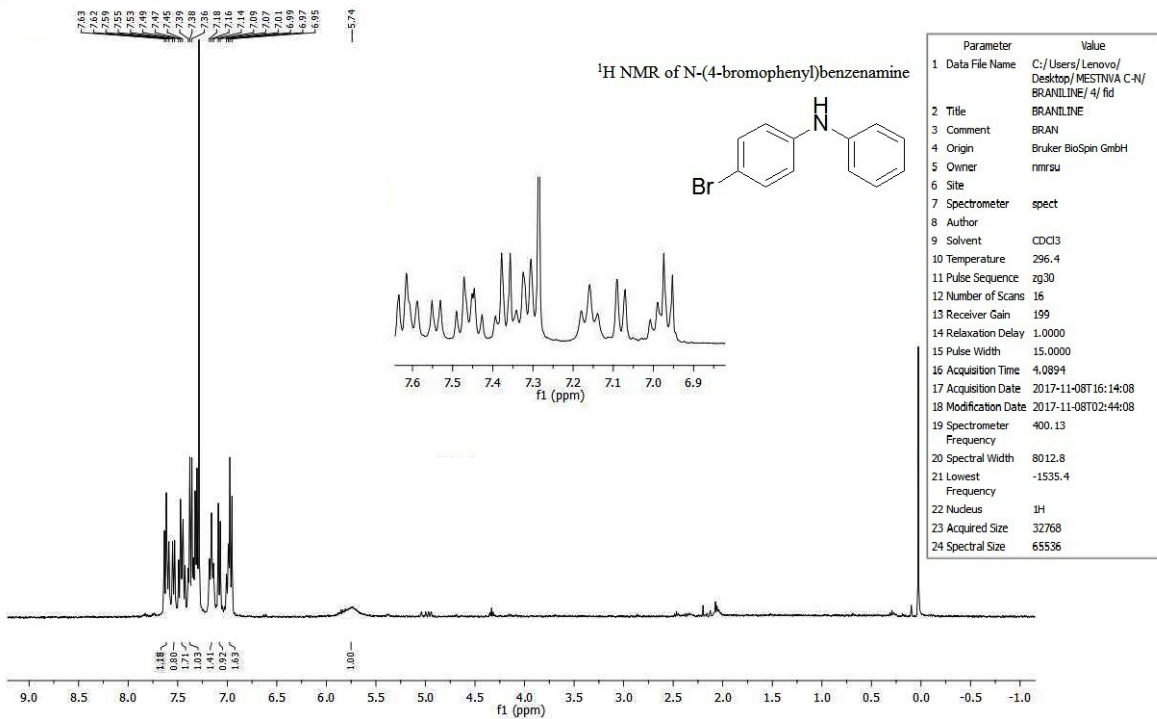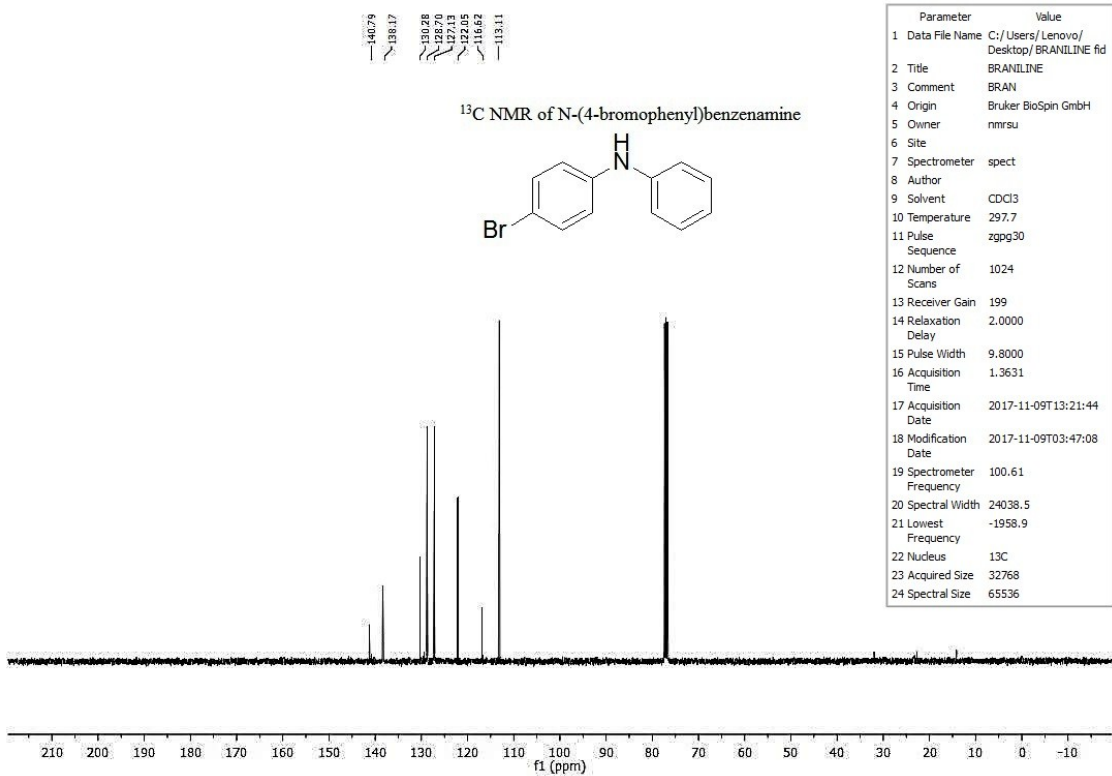

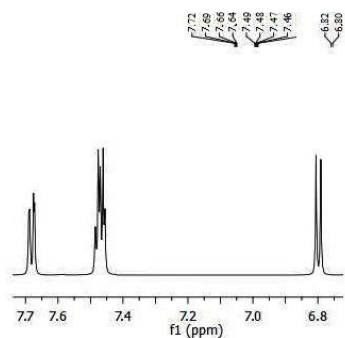

<sup>1</sup>H NMR of 4-Aminodiphenyl

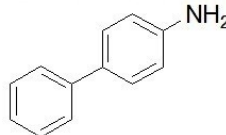

| Parameter                 | Value                     |
|---------------------------|---------------------------|
| 1 Data File Name          | D:/B spectra/ suzuki/ fid |
| 2 Title                   | suzuki                    |
| 3 Comment                 | S-BRAN                    |
| 4 Origin                  | Bruker BioSpin GmbH       |
| 5 Owner                   | nmrsu                     |
| 6 Site                    |                           |
| 7 Spectrometer            | spect                     |
| 8 Author                  |                           |
| 9 Solvent                 | CDCl3                     |
| 10 Temperature            | 294.4                     |
| 11 Pulse Sequence         | zg30                      |
| 12 Number of Scans        | 16                        |
| 13 Receiver Gain          | 78                        |
| 14 Relaxation Delay       | 1.0000                    |
| 15 Pulse Width            | 15.0000                   |
| 16 Acquisition Time       | 4.0894                    |
| 17 Acquisition Date       | 2017-11-22T14:47:20       |
| 18 Modification Date      | 2017-11-22T02:18:32       |
| 19 Spectrometer Frequency | 400.13                    |
| 20 Spectral Width         | 8012.8                    |
| 21 Lowest Frequency       | -1535.4                   |
| 22 Nucleus                | 1H                        |
| 23 Acquired Size          | 32768                     |
| 24 Spectral Size          | 65536                     |

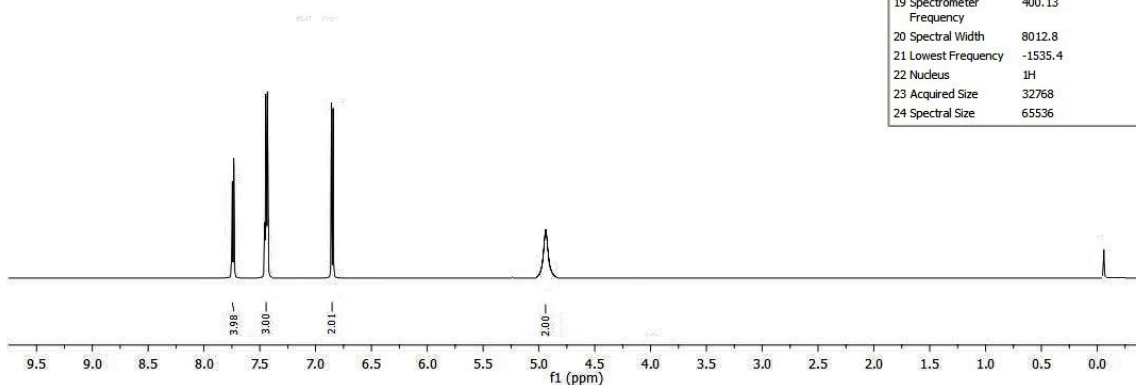

<sup>13</sup>C NMR of 4-Aminodiphenyl

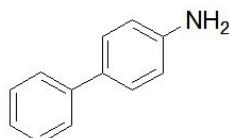

| Parameter                 | Value                     |
|---------------------------|---------------------------|
| 1 Data File Name          | D:/B spectra/ suzuki/ fid |
| 2 Title                   | suzuki                    |
| 3 Comment                 | S-BRAN                    |
| 4 Origin                  | Bruker BioSpin GmbH       |
| 5 Owner                   | nmrsu                     |
| 6 Site                    |                           |
| 7 Spectrometer            | spect                     |
| 8 Author                  |                           |
| 9 Solvent                 | CDCl3                     |
| 10 Temperature            | 0.0                       |
| 11 Pulse Sequence         | zgpg30                    |
| 12 Number of Scans        | 616                       |
| 13 Receiver Gain          | 199                       |
| 14 Relaxation Delay       | 2.0000                    |
| 15 Pulse Width            | 9.8000                    |
| 16 Acquisition Time       | 1.3631                    |
| 17 Acquisition Date       | 2017-11-22T14:47:20       |
| 18 Modification Date      | 2017-11-22T02:18:32       |
| 19 Spectrometer Frequency | 100.61                    |
| 20 Spectral Width         | 24038.5                   |
| 21 Lowest Frequency       | -1958.9                   |
| 22 Nucleus                | 13C                       |
| 23 Acquired Size          | 32768                     |
| 24 Spectral Size          | 65536                     |

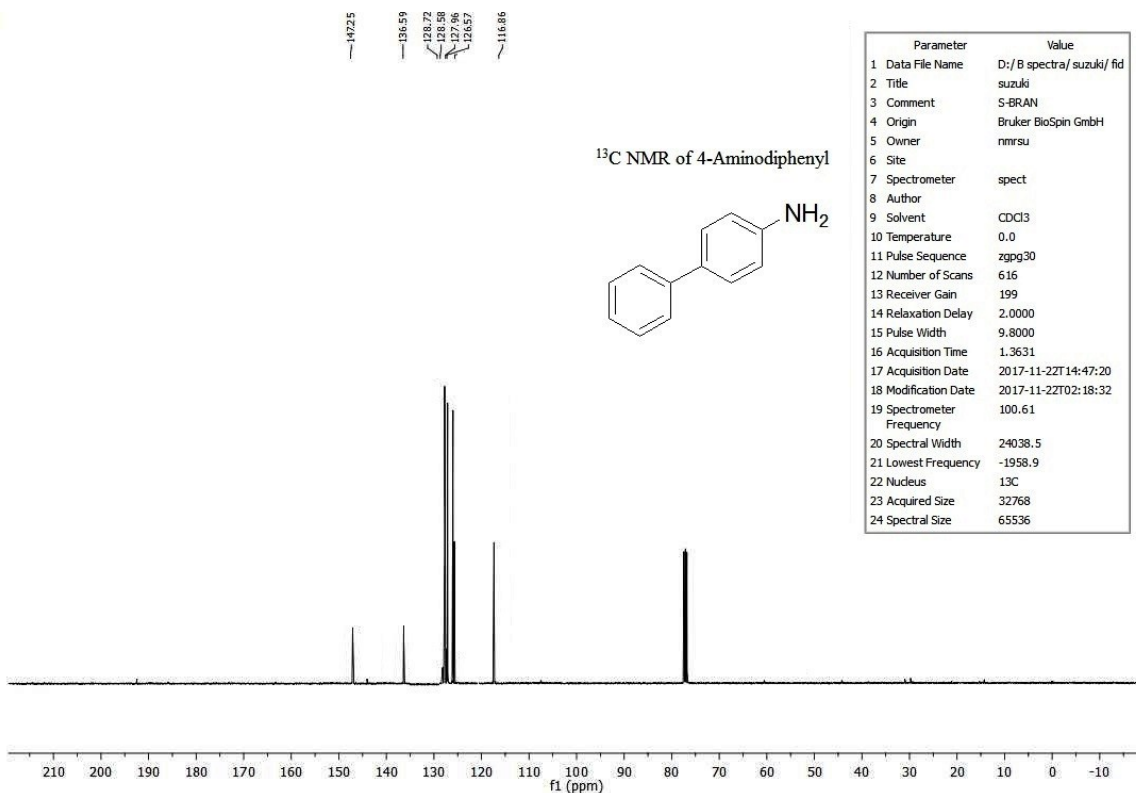

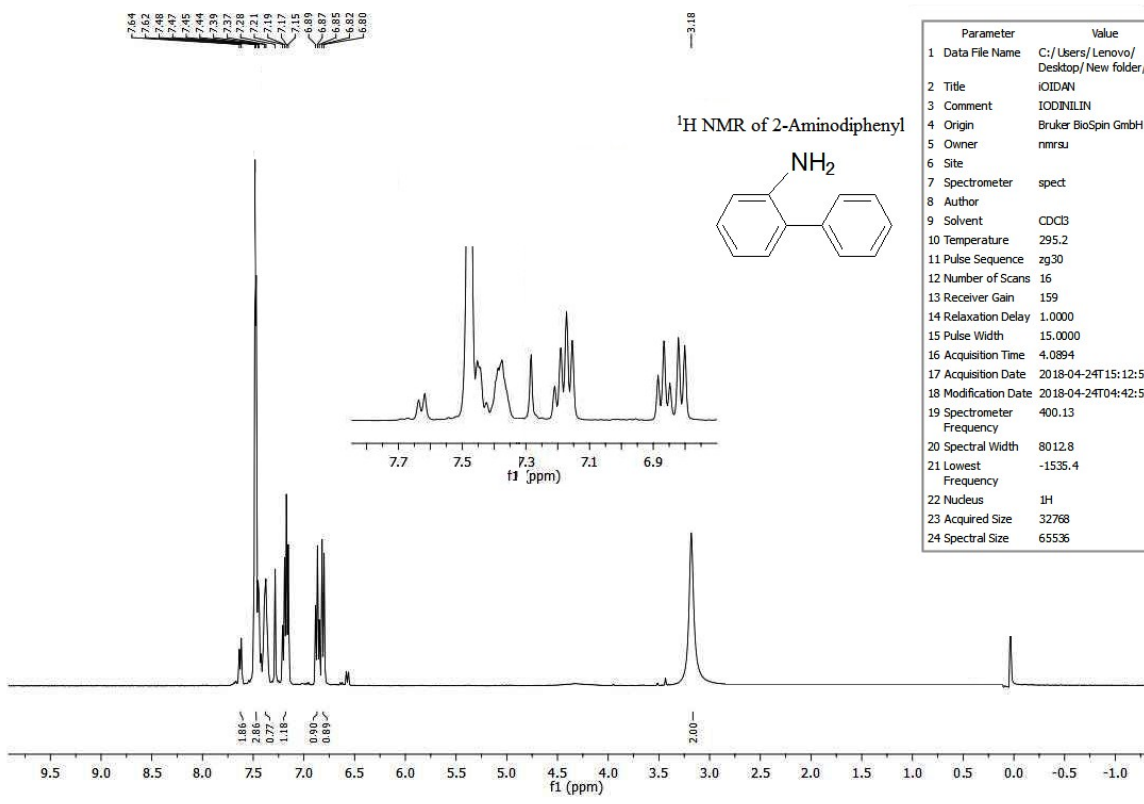

| Parameter            | Value                                  |
|----------------------|----------------------------------------|
| 1 Data File Name     | C:/Users/Lenovo/Desktop/New folder/fid |
| 2 Title              | iODAN                                  |
| 3 Comment            | IODINILIN                              |
| 4 Origin             | Bruker BioSpin GmbH                    |
| 5 Owner              | nmrsu                                  |
| 6 Site               |                                        |
| 7 Spectrometer       | spect                                  |
| 8 Author             |                                        |
| 9 Solvent            | CDCl3                                  |
| 10 Temperature       | 295.2                                  |
| 11 Pulse Sequence    | zg30                                   |
| 12 Number of Scans   | 16                                     |
| 13 Receiver Gain     | 159                                    |
| 14 Relaxation Delay  | 1.0000                                 |
| 15 Pulse Width       | 15.0000                                |
| 16 Acquisition Time  | 4.0894                                 |
| 17 Acquisition Date  | 2018-04-24T15:12:53                    |
| 18 Modification Date | 2018-04-24T04:42:56                    |
| 19 Spectrometer      | 400.13<br>Frequency                    |
| 20 Spectral Width    | 8012.8                                 |
| 21 Lowest            | -1535.4<br>Frequency                   |
| 22 Nucleus           | <sup>1</sup> H                         |
| 23 Acquired Size     | 32768                                  |
| 24 Spectral Size     | 65536                                  |

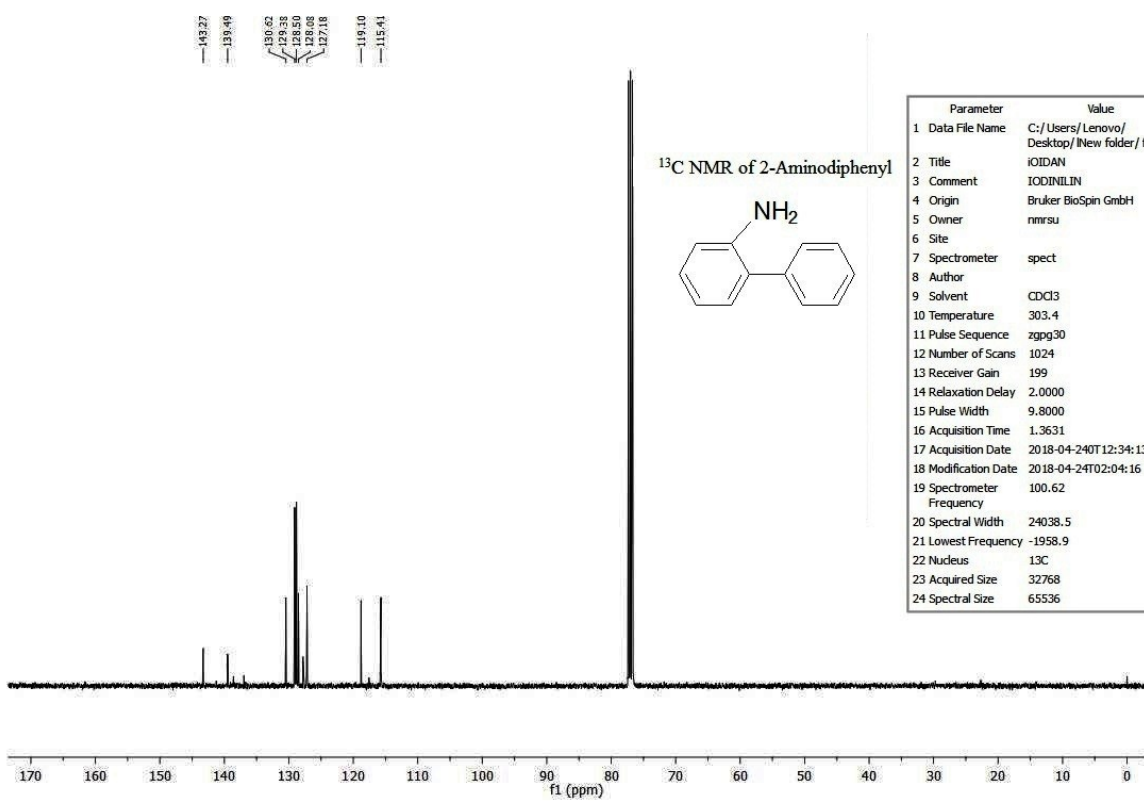

| Parameter            | Value                                  |
|----------------------|----------------------------------------|
| 1 Data File Name     | C:/Users/Lenovo/Desktop/New folder/fid |
| 2 Title              | iODAN                                  |
| 3 Comment            | IODINILIN                              |
| 4 Origin             | Bruker BioSpin GmbH                    |
| 5 Owner              | nmrsu                                  |
| 6 Site               |                                        |
| 7 Spectrometer       | spect                                  |
| 8 Author             |                                        |
| 9 Solvent            | CDCl3                                  |
| 10 Temperature       | 303.4                                  |
| 11 Pulse Sequence    | zgpg30                                 |
| 12 Number of Scans   | 1024                                   |
| 13 Receiver Gain     | 199                                    |
| 14 Relaxation Delay  | 2.0000                                 |
| 15 Pulse Width       | 9.8000                                 |
| 16 Acquisition Time  | 1.3631                                 |
| 17 Acquisition Date  | 2018-04-24T12:34:13                    |
| 18 Modification Date | 2018-04-24T02:04:16                    |
| 19 Spectrometer      | 100.62<br>Frequency                    |
| 20 Spectral Width    | 24038.5                                |
| 21 Lowest Frequency  | -1958.9                                |
| 22 Nucleus           | <sup>13</sup> C                        |
| 23 Acquired Size     | 32768                                  |
| 24 Spectral Size     | 65536                                  |

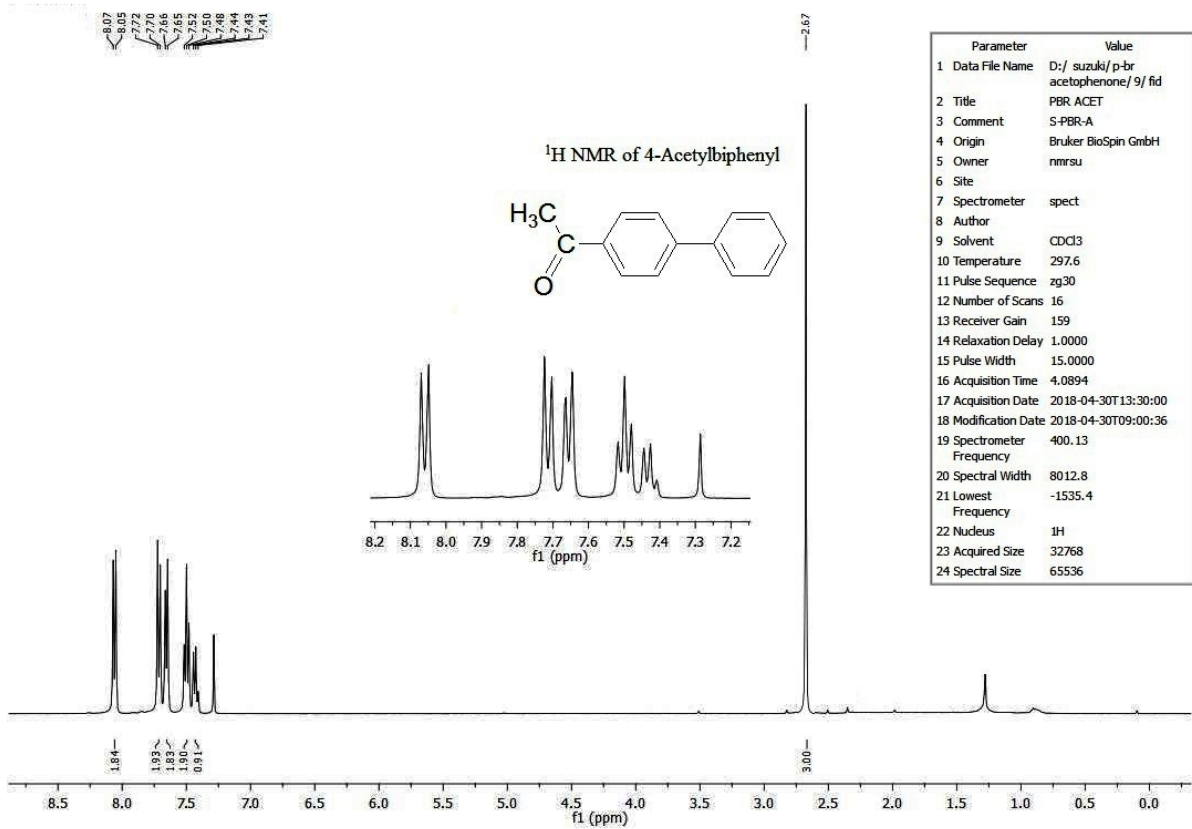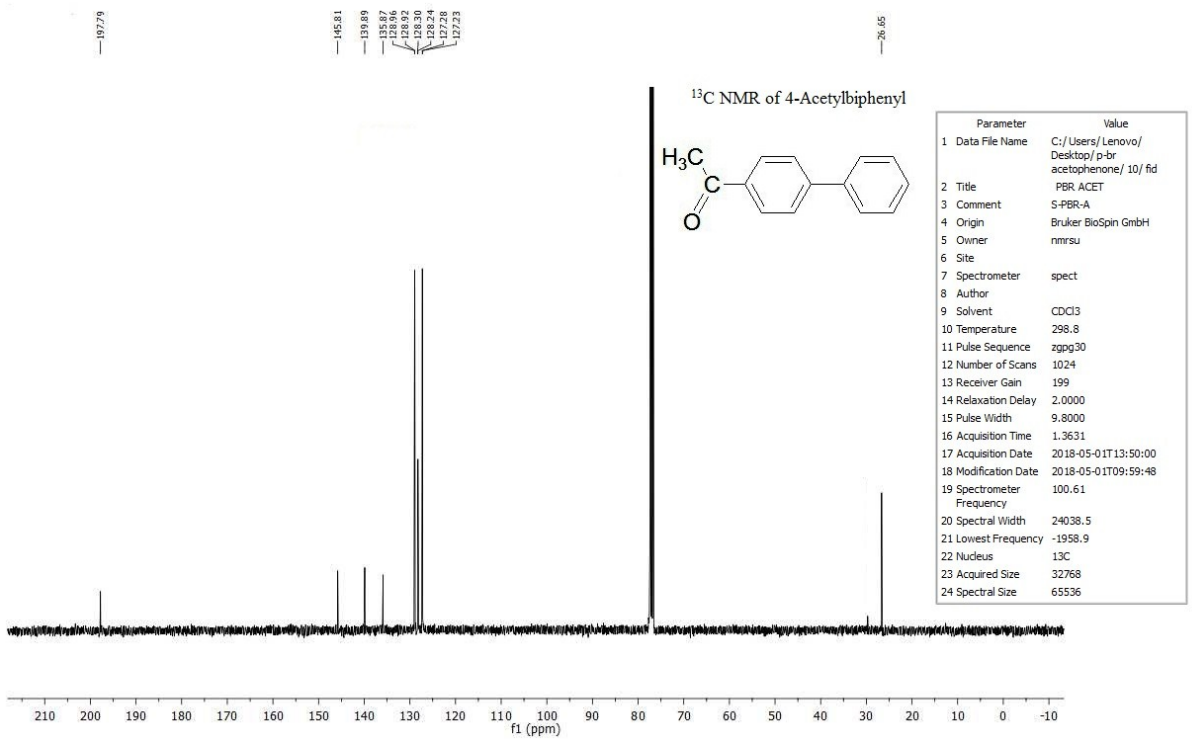

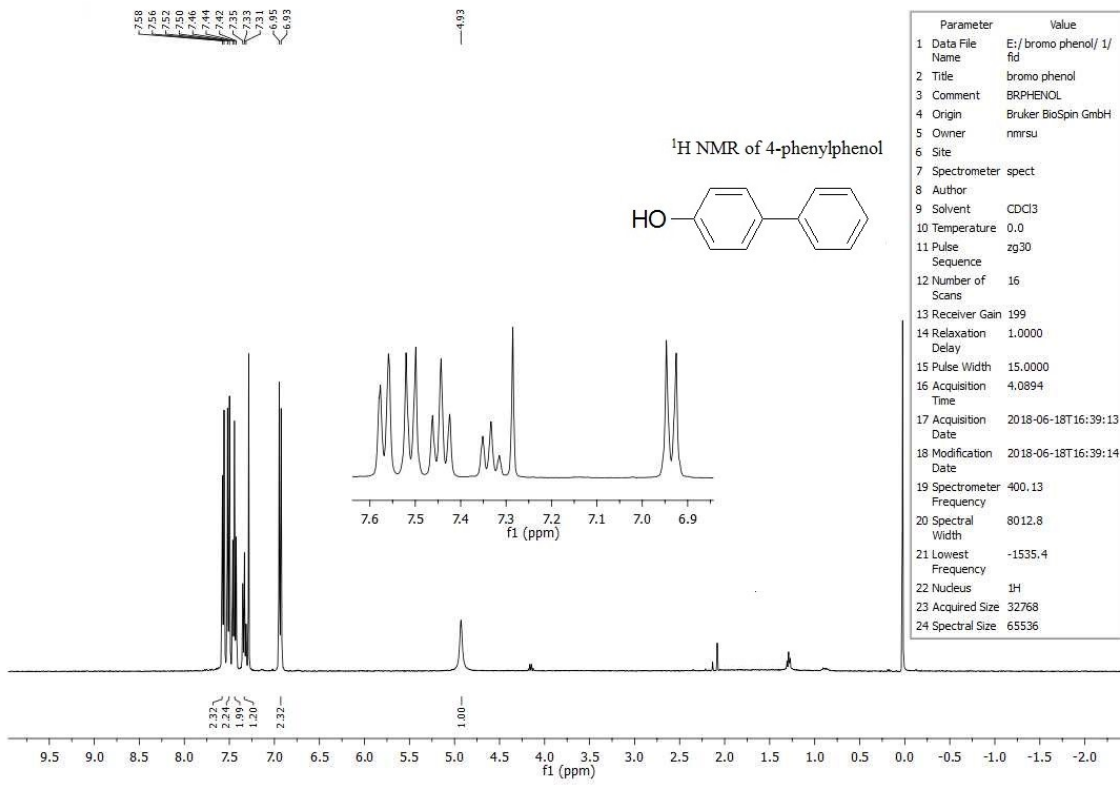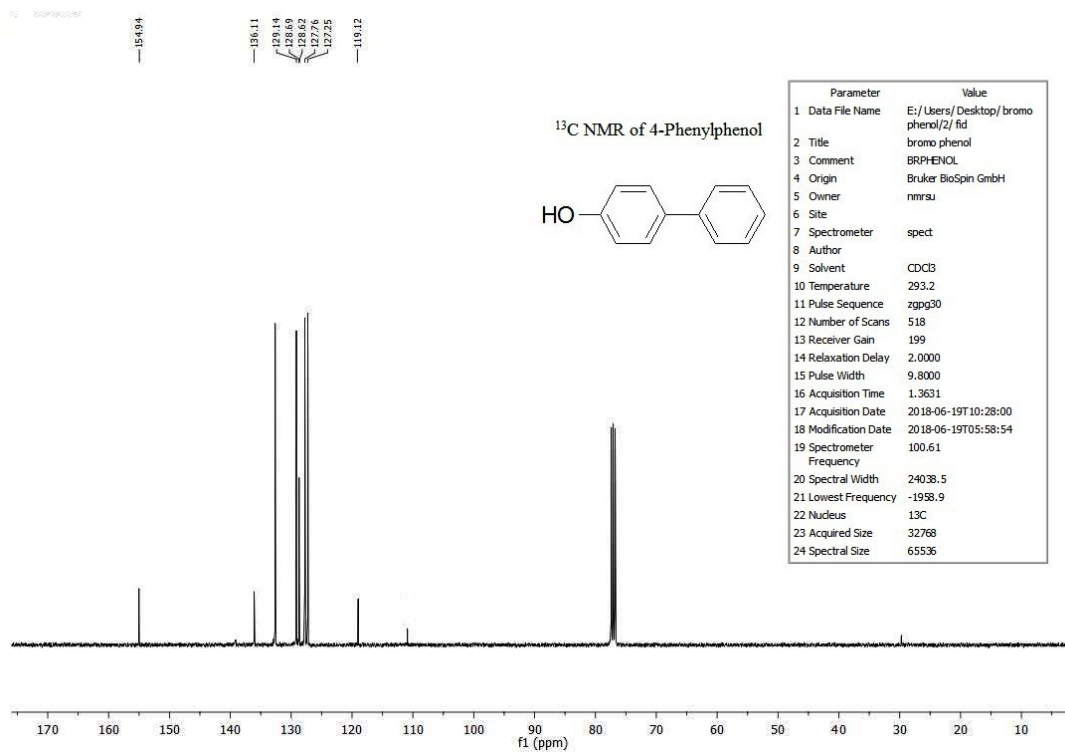



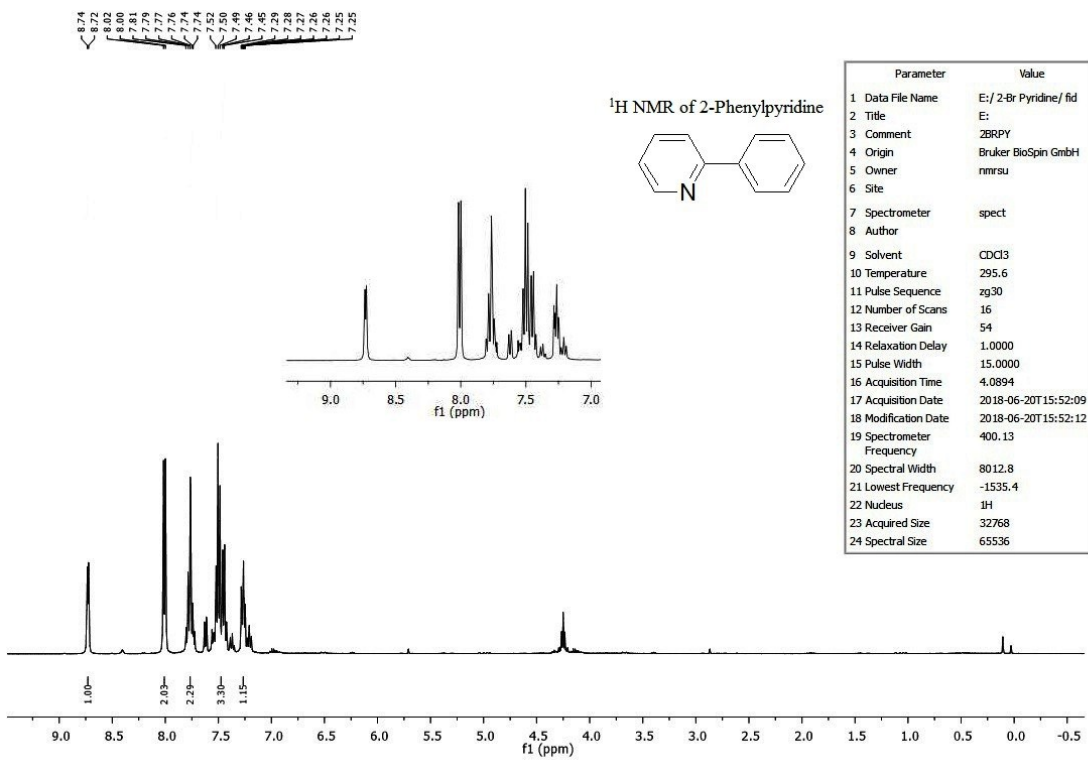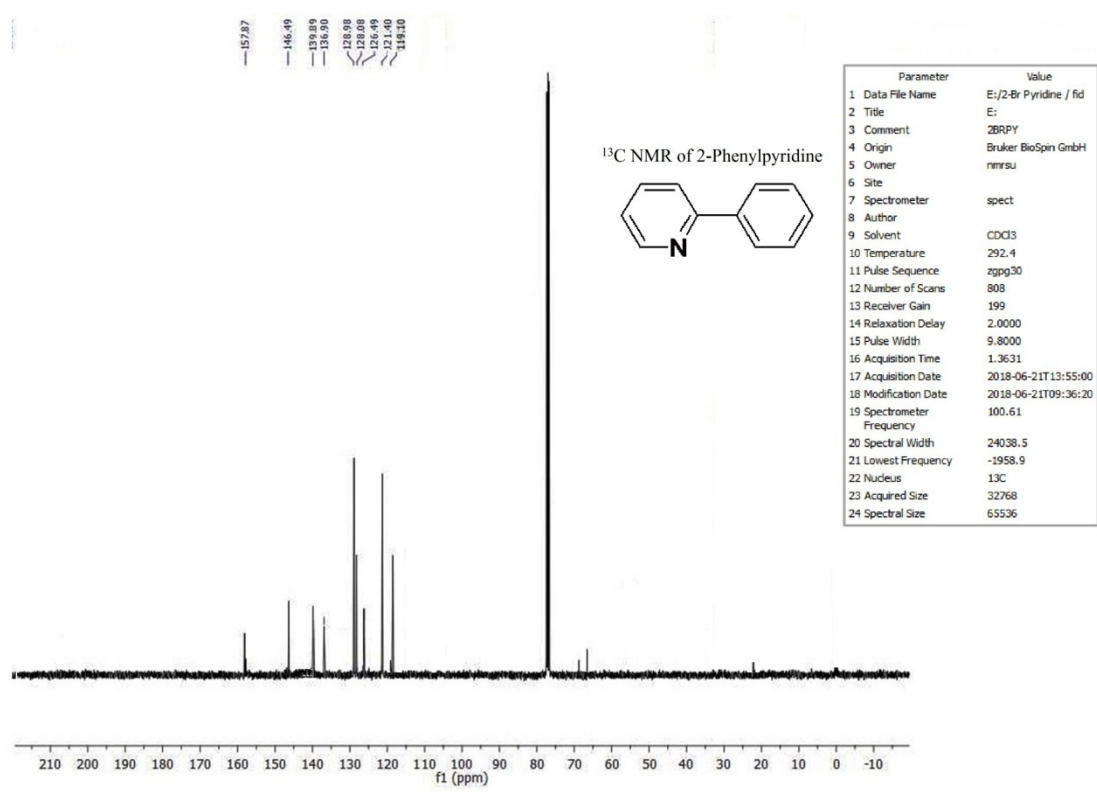

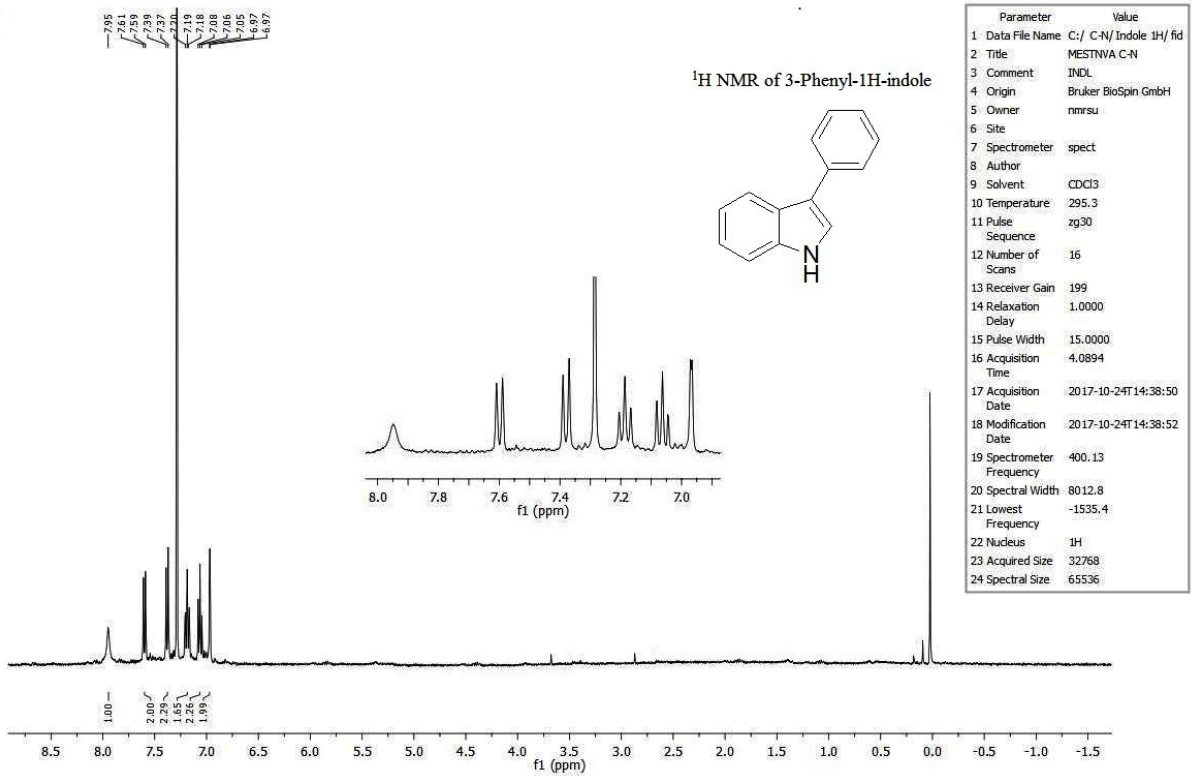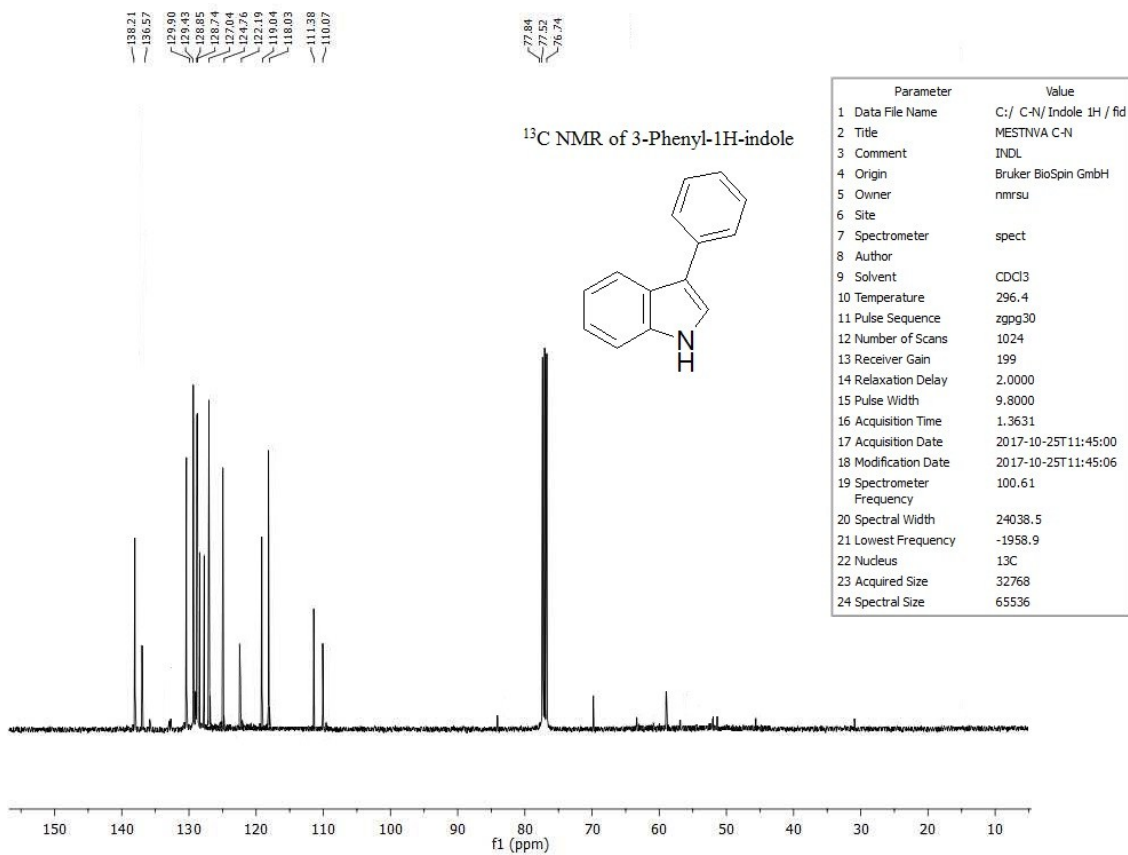

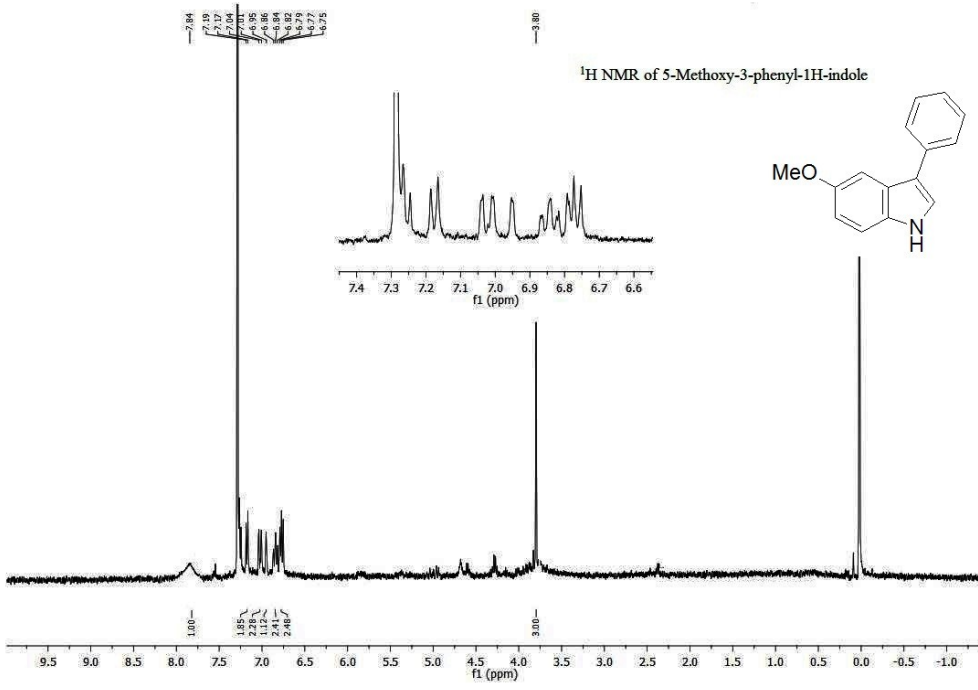

| Parameter                 | Value                                                |
|---------------------------|------------------------------------------------------|
| 1 Data File Name          | C:/Users/Lenovo/AppData/Local/Temp/MesReNova/1/2/fid |
| 2 Title                   |                                                      |
| 3 Comment                 | MEON                                                 |
| 4 Origin                  | Bruker BioSpin GmbH                                  |
| 5 Owner                   | nmsu                                                 |
| 6 Site                    |                                                      |
| 7 Spectrometer            | spect                                                |
| 8 Author                  |                                                      |
| 9 Solvent                 | CDCl3                                                |
| 10 Temperature            | 290.1                                                |
| 11 Pulse Sequence         | zg30                                                 |
| 12 Number of Scans        | 16                                                   |
| 13 Receiver Gain          | 199                                                  |
| 14 Relaxation Delay       | 1.0000                                               |
| 15 Pulse Width            | 15.0000                                              |
| 16 Acquisition Time       | 4.0894                                               |
| 17 Acquisition Date       | 2018-01-04T12:41:10                                  |
| 18 Modification Date      | 2018-01-04T11:34:29                                  |
| 19 Spectrometer Frequency | 400.13                                               |
| 20 Spectral Width         | 8012.8                                               |
| 21 Lowest Frequency       | -1535.4                                              |
| 22 Nucleus                | <sup>1</sup> H                                       |
| 23 Acquired Size          | 32768                                                |
| 24 Spectral Size          | 65536                                                |

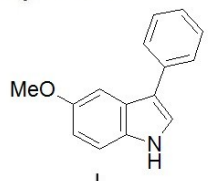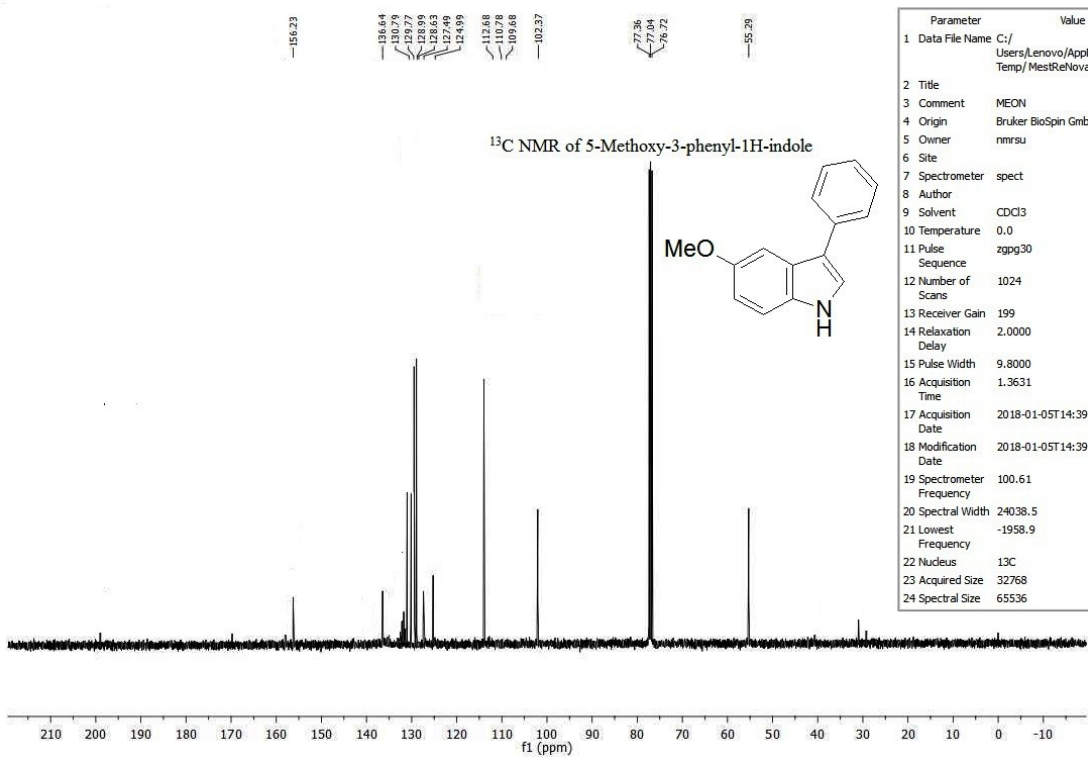

| Parameter                 | Value                                              |
|---------------------------|----------------------------------------------------|
| 1 Data File Name          | C:/Users/Lenovo/AppData/Local/Temp/MesReNova/2/fid |
| 2 Title                   |                                                    |
| 3 Comment                 | MEON                                               |
| 4 Origin                  | Bruker BioSpin GmbH                                |
| 5 Owner                   | nmsu                                               |
| 6 Site                    |                                                    |
| 7 Spectrometer            | spect                                              |
| 8 Author                  |                                                    |
| 9 Solvent                 | CDCl3                                              |
| 10 Temperature            | 0.0                                                |
| 11 Pulse Sequence         | zgpg30                                             |
| 12 Number of Scans        | 1024                                               |
| 13 Receiver Gain          | 199                                                |
| 14 Relaxation Delay       | 2.0000                                             |
| 15 Pulse Width            | 9.8000                                             |
| 16 Acquisition Time       | 1.3631                                             |
| 17 Acquisition Date       | 2018-01-05T14:39:12                                |
| 18 Modification Date      | 2018-01-05T14:39:14                                |
| 19 Spectrometer Frequency | 100.61                                             |
| 20 Spectral Width         | 24038.5                                            |
| 21 Lowest Frequency       | -1958.9                                            |
| 22 Nucleus                | <sup>13</sup> C                                    |
| 23 Acquired Size          | 32768                                              |
| 24 Spectral Size          | 65536                                              |

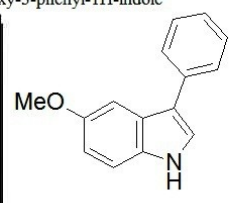

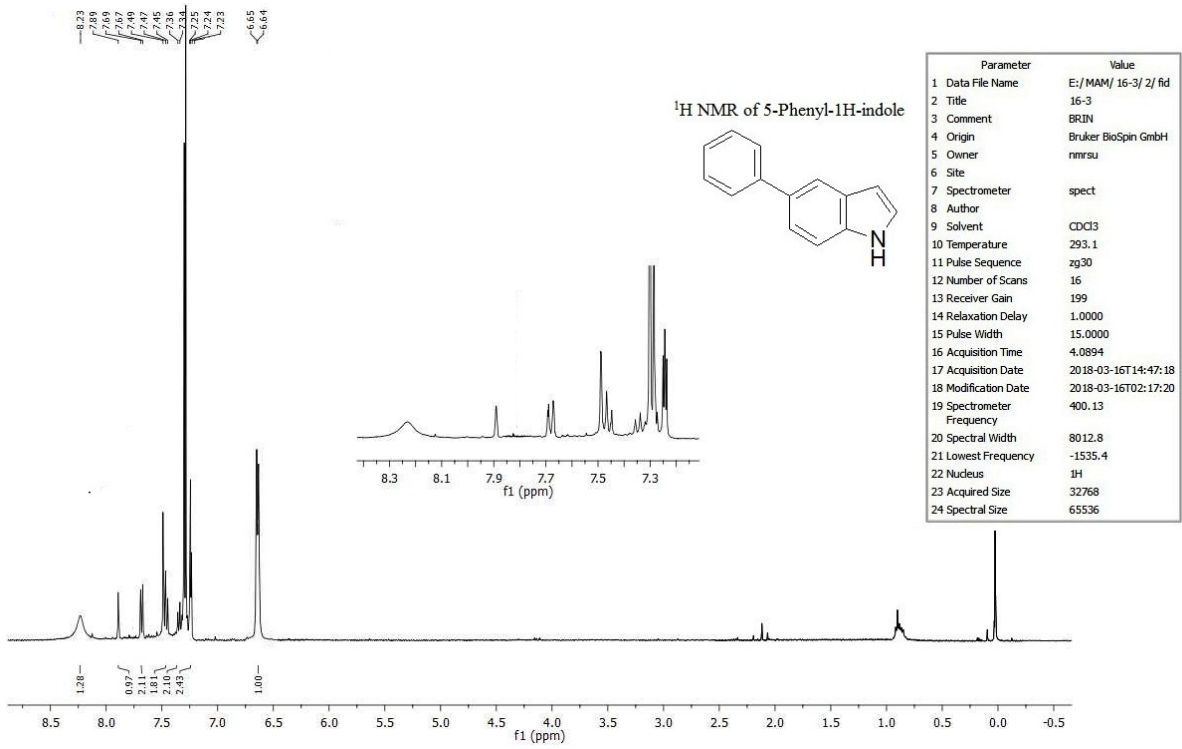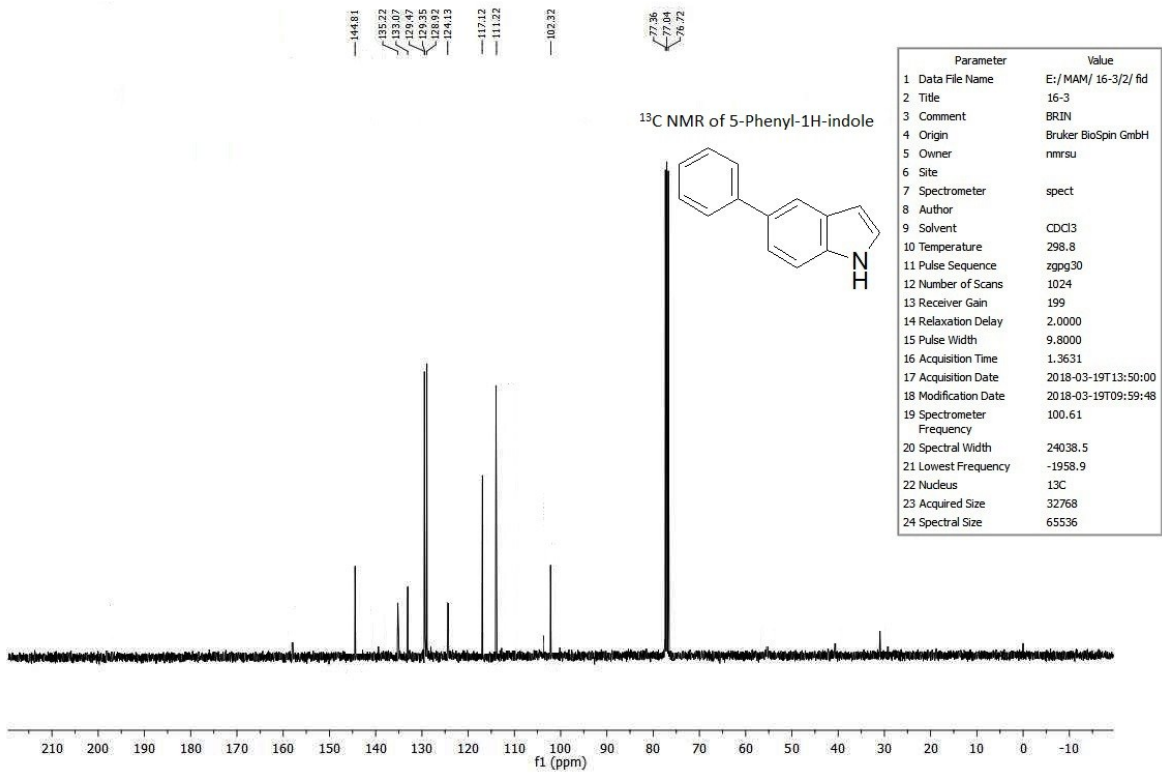

Supplement: c8nj05050c1.pdf [file c8nj05050c1.pdf]
